# Supplementary material for: A Comprehensive Investigation of Macro-Composition and Volatile Compounds in Spring-Picked and Autumn-Picked White Tea
Source: MDPI journal article supplement (doi:10.3390/foods11223628), 2022-11-14
Supplement: s1 [file s1]

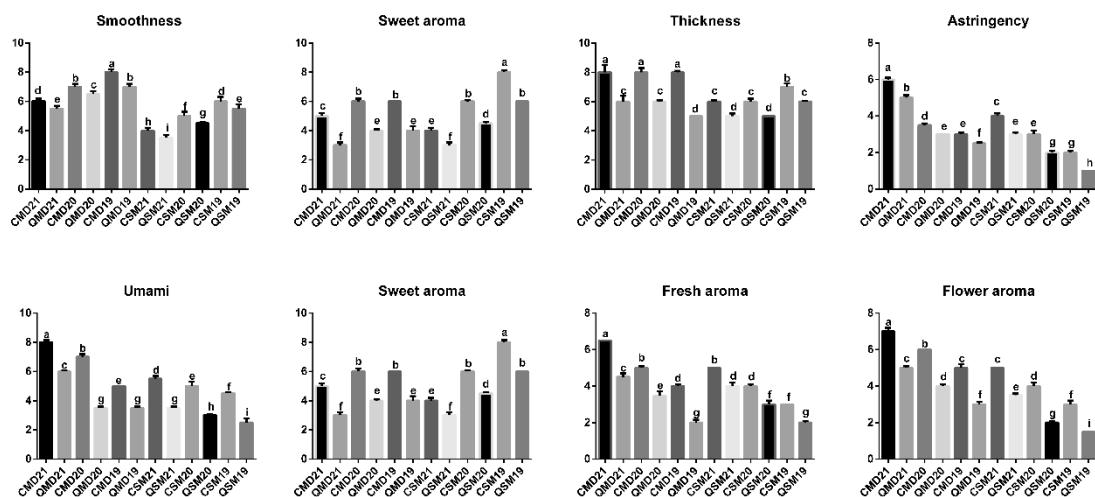

Figure S1. The results of the significant difference analysis of the taste and aroma attribute scores, The various superscripts show significant differences ( $p < 0.05$ ).

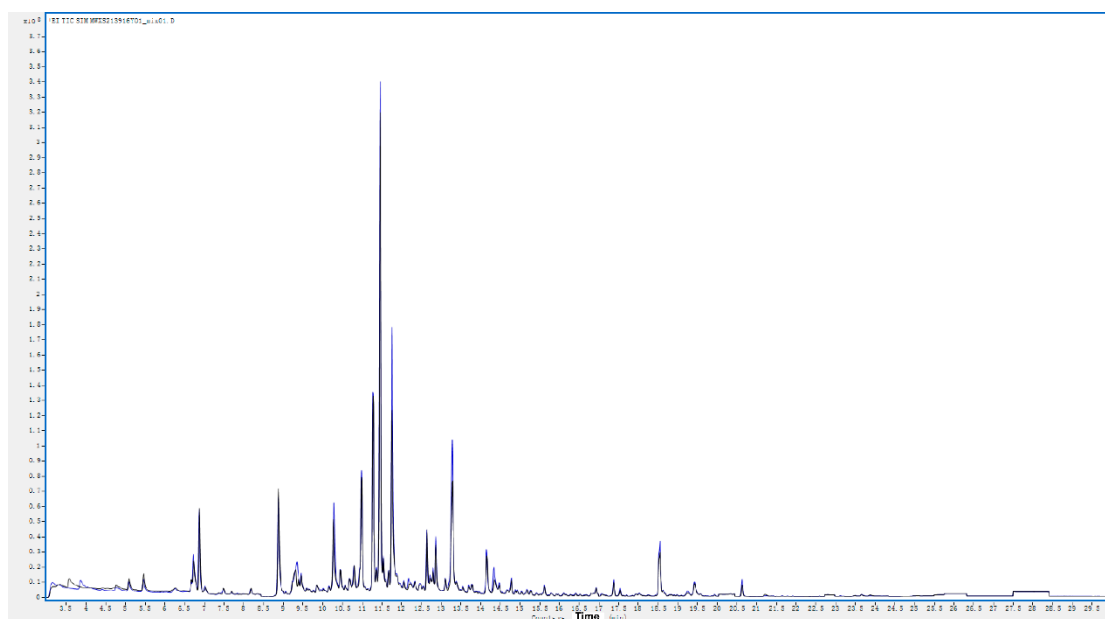

Figure S2. Total ion chromatogram of mixed sample mass spectrometry analysis for quality control

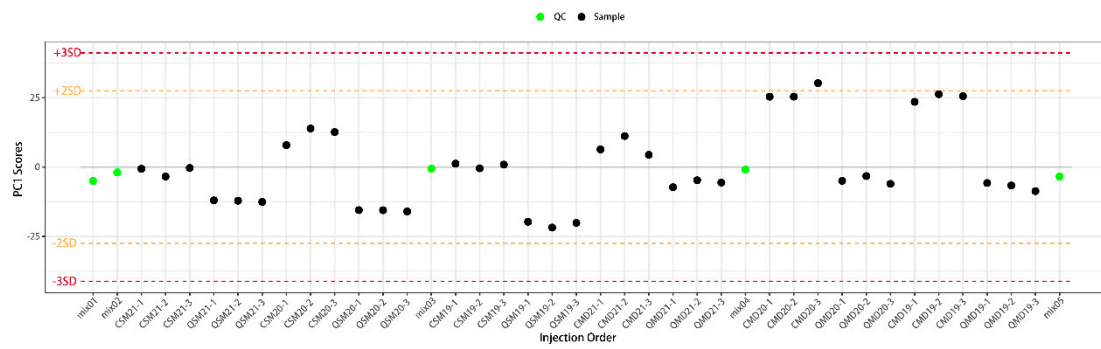

Figure S3: Overall sample PC1 control chart; Table S1: White tea sample information
