# Supplementary material for: A Comprehensive Investigation of Macro-Composition and Volatile Compounds in Spring-Picked and Autumn-Picked White Tea
Source: Foods. 2022 Nov 14;11(22):3628. doi: 10.3390/foods11223628 (PMC9688969; doi:10.3390/foods11223628)
Supplement: Supplementary file 1 [file foods-11-03628-s001.zip › Supplementary tables.xlsx]

## Sheet: Table S1
Table S1. The headspace solid-phase micro extraction (HS-SPME) and gas chromatography-mass spectrometry (GC-MS) conditions
Instrument	Model
GC-MS	8890-7000D (Agilent J&W Scientific, Folsom, CA, USA)
Solid phase microextraction unit	SPME Allow (CTC Analytics AG, Zwingen, Switzerland)
Incubation unit	Fiber Conditioning Station (CTC Analytics AG)
Capillary column	DB-5MS (30 m x 0.25 mm x 0.25 μm) (Agilent J&W Scientific)
Extraction head	120 μm DVB/CAR/ PDMS (Agilent J&W Scientific)
HS-SPME condition	Parameter
Preparation of extraction head	Shake for 5 min at a constant temperature of 60 ℃
The incubate time of extraction head	250 °C for 5 min under Fiber Conditioning Station (before absorb the volatiles)
Extraction time	15 min
Resolution time	5 min at a constant temperature of 250 ℃
Chromatography condition
Carrier gas	Helium (purity ≥ 99.999%)
Column flow	1.2 mL/min
Injector temperature	250 °C
Front inlet mode	Splitless
Solvent delay	3.5 min
Oven temperature ramp	1) 40°C hold on 3.5 min; 2) raised to 100°C at a rate of 10 °C/min; 3) raised to 180°C at a rate of 7 °C/min; 4) raised to 280°C at a rate of 25 °C/min; 5) hold for 5 min
Mass condition	Parameter
Ion source temperature	230°C
Quad temperature	150°C
Front Injection temperature	280°C
Electron energy	70eV
Transfer line temperature	280°C
Scan mode	SIM
The range of mass scan	m/z 50-500 amu

## Sheet: Table S2
Table S2. Average temperature for production months
	production months
Date	2019.4	2019.9	2020.4	2020.9	2021.4	2021.9
Average temperature	19.65℃	27.2℃	17.15℃	25.7℃	19.2℃	28.9℃

## Sheet: Table S3
Table S3. The qualitative results for the VOCs in SPWTs and APWTs
No.	Volatile compounds	CAS	RI	Odor description	Concentration(ug/kg)
					CSM21	QSM21	CSM20	QSM20	CSM19	QSM19	CMD21	QMD21	CMD20	QMD20	CMD19	QMD19
	Ester
1	Methyl methacrylate	80-62-6	714	acrylic aromatic fruity	2355.8±153.53	908.63±236.11	2488.66±167.73	707.28±42.16	1948.81±10.74	1246.57±119.36	1792.18±53.98	2175.75±401.29	3500.41±177.09	1829.12±223.21	3217.1±284.92	1712.99±242.07
2	Phenylacetic acid propyl ester	4606-15-9	1331	sweet honey floral apricot rose	1183.83±589.64	645.96±293.09	976.53±147.87	1096.71±136.25	610.38±79.38	572.88±41.36	1592.77±193.31	1671.95±516.91	1238.38±563.01	1013.07±556.18	1206.38±518.94	690.5±228.05
3	ethyl 2-methyl-2-butenoate	55514-48-2	937		1175.71±114.44	1384.57±94.07	1847.87±148.08	1090.45±45.5	1679.65±104.32	756.78±88.54	1545.7±78.17	1266.11±88.63	1645.21±131.41	1186.79±97	1702.01±171.38	1269.11±123.34
4	Carveol acetate	97-42-7	1336	green minty spearmint nasturtium herbal rummy grape pear spicy	812.88±415.7	453.69±207.37	619.24±94.86	735.06±95.4	432.21±52.3	444.96±30.52	1108.06±139.48	1156.97±362.39	802.89±386.66	672.48±398.98	771.72±369.64	441.35±158.74
5	Methyl anthranilate	134-20-3	1343	fruity grape orangeflower neroli	802.24±411.66	439.78±204.19	615.41±94.96	722.72±93.81	367.71±48.75	399.48±34.37	1086.09±138.92	1154.4±361.72	794.84±384.38	659.89±397.27	764.94±367.98	433.82±157.29
6	2-Methylpropyl butanoate	539-90-2	954	sweet fruity pineapple tutti frutti rum cherry apple overripe fruit bubble gum	855.14±88.6	605.76±38.63	1302.25±127.22	509.95±34	1253.59±79.78	369.35±25.38	1206.47±29.99	672.49±73.38	1094.21±101.15	580.35±23.37	1168.89±112.82	621.88±62.45
7	3-Methylbutyl butyrate	106-27-4	1056	fruity green apricot pear banana	781.21±53.71	578.08±35.09	743.74±32.52	567.9±56.14	488.05±207.9	340.39±20.81	438.4±130.69	249.51±18.63	335.32±9.42	305.72±25.74	416.24±180.14	239.64±30.32
8	Ethyl 3-Hydroxyhexanoate	2305-25-1	1133	fruity grape burnt wood hay spicy pineapple cranberry dusty woody	720.91±87.24	522.63±60.66	725.09±74.55	425.29±30.05	826.01±85.26	485.26±36.02	840.35±150.14	572.61±95.1	796.5±58.71	563.39±56.49	826.96±96.41	386.98±75.21
9	Formic acid butyl ester	592-84-7	724	fruity plum rum brandy	488.57±45.67	246.59±22.13	482.04±50.81	282.29±40.64	424.23±18.32	248.09±24.94	436.78±31.15	484.76±91.25	576.64±25	332.19±20.17	672.78±52.07	332.76±27.91
10	Butanoic acid, phenylmethyl ester	103-37-7	1347	fresh fruity jasmin apricot loganberry	298.37±157.43	154.04±75.68	234.05±34.92	259.71±36.11	120.9±17.46	113.09±9.33	404.83±58.64	435.88±143.35	325.37±152.44	237.93±155.17	311.74±147.41	160.74±61.46
11	Pantolactone	599-04-2	1148	cotton candy	184.21±18.91	135.58±17.63	197.28±17.86	113.1±10.15	248.55±20.98	125.3±10.22	183.35±31.95	133.99±25.29	193.74±11.43	130.61±7.71	206.89±19.55	104.48±19.96
12	2-Ethylbutyl acetate	10031-87-5	925	ethereal sweet fruity banana musty oily	179±12.39	219.92±21.79	173.71±13.98	109.24±4.17	167.44±27.09	159.04±22.04	122.61±13.42	114.03±2.86	146.37±6.31	149.21±6.34	152.21±19.72	139.38±7.13
13	Propanoic acid, 2,2-dimethyl-, pentyl ester	2313-68-0	1063		174.25±14.28	149.98±14.88	166.23±15.33	102.84±5.68	128.59±26.19	85.9±7.17	109.94±18.32	97.83±7.33	130.49±7.58	111.19±11.29	113.85±10.47	78.77±12.42
14	Butanoic acid, butyl ester	109-21-7	995	fruity banana pineapple green cherry tropical fruit ripe fruit juicy fruit	136.41±5.19	58.72±3.15	383.54±2.89	63.25±3.51	154.94±3.16	85.6±6.43	164.39±23.69	94.28±5.71	578.43±26.47	187.12±15.21	591.7±35.4	105.63±7.12
15	3-Methylbutyl 3-methylbutanoate	659-70-1	1104	sweet fruity green ripe apple jammy tropical	131.49±31.11	98.66±26.83	122.63±12.58	122.91±9.1	103.35±10.81	107.72±1.7	134.37±18.21	121.59±4.37	141.84±40.79	137.62±32.75	117.63±8.46	103.03±11.65
16	Iso-3-thujyl acetate	62181-90-2	1298		59±53.92	27.24±16.94	46.17±0.7	42.53±8.23	46.64±2.39	33.74±0.93	118.48±35	66.11±32.49	67.91±44.3	39.07±29.1	130.06±123.91	50.52±46.72
17	3-Methylheptyl acetate	72218-58-7	1118		133.98±13.17	88.79±9.87	140.7±20.88	80.68±11.92	188.52±27.37	165.77±50.78	114.06±16.95	70.66±4.89	178.61±29.49	106.67±3.92	148.56±18.03	173.56±19.01
18	caramel furanone	28664-35-9	1110	extremely sweet strong caramel maple burnt sugar coffee	116.93±27.04	17.56±4.2	198.62±21.42	15.65±1.02	202.67±28.28	25.13±2.84	413.51±43.58	26.89±3.16	630.1±50.27	28.61±2.09	709.07±28.08	50.12±7.98
19	Isoamyl 2-methylbutyrate	27625-35-0	1101	sweet fruity citrus cherry blueberry apple	122.46±29.61	93.5±28.39	114.51±10.05	121.69±13.04	84.68±10.04	94.1±2.94	133.92±12.27	107.81±2.51	134.31±35.87	122.61±37.23	115.08±7.65	95.18±14.73
20	Pentyl Acrylate	2998-23-4	974		111.93±6.72	55.43±7	188.85±5.35	96.75±9.28	177.12±2.01	118.36±4.32	103.5±5.77	67.55±5.37	152.84±11.29	149.78±6.2	162.37±3.77	137.99±11.24
21	2-Heptyl butanoate	39026-94-3	1218	fruity green vegetable cheesy walnut	110.58±21.58	27.22±2.15	108.23±7.52	56.15±7.67	52.02±5.78	90.89±6.54	111.46±12.65	65.79±9.28	124.75±18.59	91.31±4.47	92.39±7.68	87.35±9.79
22	Heptyl acetate	112-06-1	1112	fresh green rum ripe fruit pear apricot woody	94.57±26.23	81.97±21.61	89.24±11.1	97.86±12.31	73.35±9.01	71.5±4.39	107.26±9.29	96.72±4.25	112.94±33.59	97.42±35.12	90.56±8.63	74.87±15.02
23	2-Methylbutyl Isobutyrate	2445-69-4	1016	fruity ethereal tropical banana	106.17±10.22	44.74±1.92	96.71±7.48	56.74±4.41	31.71±5.73	96.5±9.13	99.32±11.34	55.6±4.18	65.75±0.61	98.44±20.83	34.59±2.32	65.03±16.47
24	2-Pinen-10-Yl Isobutyrate	29021-37-2	1466	fruity woody pine	94.64±19.36	63.17±16.04	25.91±3.83	62.02±2.66	242.62±15.48	578.56±29.77	116.78±7.74	10.57±0.92	31.6±6.6	45.67±4.82	29.27±5.55	64.86±3.42
25	Benzyl angelate	37526-87-7	1446		92.42±18.62	64.55±17.72	24.88±3.03	60.52±5.24	248.79±15.74	593.7±30.88	117.91±7.71	10.41±1.43	31.72±5.38	46.59±5.92	27.76±4.81	64.72±2.96
26	Formic acid, octyl ester	112-32-3	1114	fruity rose orange waxy cucumber	85.79±12.25	47.14±9.32	97.75±4.14	48.25±2.84	97.68±11.5	29.13±0.46	143.58±7.19	40.2±7.67	185.09±8.71	29.2±0.98	202.45±2.58	30.05±1.56
27	Lavandulyl acetate	25905-14-0	1270		90.18±14.39	77.18±4.27	38.25±5.39	51.11±4.07	511.82±27.19	526.46±23.88	125.05±19.18	32.58±6.03	45.24±5.68	73.19±6.58	44.93±1.77	47.34±9.09
28	Ethyl Salicylate	118-61-6	1270	sweet wintergreen mint floral spicy balsam	89.15±12.96	89.45±3.47	23.69±1.05	45.11±3.64	678.05±37.22	695.22±37.24	133.28±19.77	13.23±1.22	29.57±3.62	74.29±5.57	38.4±3.48	44.1±6.44
29	Isopentyl hexanoate	2198-61-0	1250	fruity banana apple pineapple green	76.96±10.57	45.53±4.18	76.4±10.12	53.57±4.94	51.03±26.68	25.56±0.7	43.45±13.22	21.67±4.07	35.06±5.58	24.54±1.51	46.91±17.4	27.12±2.83
30	Cyclohexanecarboxylic acid, ethyl ester	3289-28-9	1136	fruity cheese winey	92.51±13.5	64.66±7.05	124.6±9.34	58.51±4.56	86.23±8.58	58.97±4.2	104.5±17.58	83.5±7.81	151.52±2.45	92.13±10.43	168.4±13.12	48.88±8.95
31	Geranyl formate	105-86-2	1301	fresh rose neroli tea rose green	65.2±13.23	60.48±22.44	105.95±7.96	113.21±18.42	140.39±8.2	97.71±3.84	82.86±9.6	55.33±7.28	78.63±17.62	61.79±2.04	102.8±15.37	60.03±11.86
32	2-Methylbutyl Hexanoate	2601-13-0	1247	ethereal	67.8±8.24	41.04±3.95	67.72±9.59	48.62±5.21	43.08±23.25	22.51±0.76	38.45±12.56	18.65±2.9	30.58±4.75	22.94±1.12	41.15±16.48	23.67±1.42
33	Cyclopentyl Butyrate	6290-13-7	1126		79.19±9.36	49.44±5.8	122.33±6.76	36.56±2.42	112.89±10.82	47.35±6.27	125.83±38.13	52.8±7.22	230.04±46.46	84.68±17.97	243.51±12.24	55.63±12.34
34	Benzyl 3-methylbutanoate	103-38-8	1395	sweet fruity apple pineapple herbal	61.43±4.46	39.44±11.93	69.96±11.86	103.21±1.2	137.15±7.24	124.33±4.41	54.62±7.89	30.71±4.16	80.34±17.33	100.75±12.73	70.19±15.33	91.51±5.75
35	Benzyl Valerate	10361-39-4	1396	fruity floral apple skin	60.8±4.19	39.51±13.19	63.3±7.29	98.7±1.3	119.83±10.73	115.74±3.47	56.58±10.9	29.18±5.18	63.18±16.16	97.53±14.39	59.63±12.47	86.35±5.17
36	Isobutyl 2-phenylacetate	102-13-6	1393	sweet floral honey chocolate amber	61.23±11.87	41.42±11.59	79.13±12.36	100.02±4.82	147.42±10.18	134.04±3.71	57.37±7.89	28.5±2	89.1±18.28	104.44±7.81	82.41±18.95	97.73±6.57
37	(E)-2-Methylbut-2-en-1-yl methacrylate	88142-95-4	1088		46.99±8.12	37.41±13.37	61.62±4.31	30.9±3.3	63.31±4.32	38.03±1.66	98.83±2.34	42.86±1.01	104.54±11.13	39.86±2.84	113.97±7.42	44.56±6.76
38	Methyl 2-(methylthio)acetate	16630-66-3	904	sulfurous cooked potato roasted nut fruity tropical	47.48±1.05	29.92±9.72	68.64±3.25	33.09±3.35	95.21±9.76	37.63±2.84	72.51±2.85	31.74±4.49	90.06±0.62	40.61±2.75	84.61±2.11	48.11±7.51
39	Hexyl acetate	142-92-7	1014	fruity green apple banana sweet	41.98±4.27	46.2±14.58	61.78±2.53	35.37±3.72	52.77±3.7	57.83±5.25	72.94±4.94	41.65±4.99	99.15±5.43	58.22±8.56	91.73±1.86	51.38±1.91
40	3-Mercapto-3-methylbutyl formate (ester)	50746-10-6	1023	sulfurous catty caramelised onion; roast coffee, roast meat, with a tropical nuance on dilution	36.86±3.78	39±8.26	64.64±2.78	24.53±1.95	0±0	32.91±2.16	44.65±1.85	35.66±2.43	47.21±2.33	79.34±6.36	51.4±2.09	30.37±1.76
41	Ethyl (Z)-2-butenoate	6776-19-8	830		33.84±4.22	49.81±13.07	68.32±1.62	28.61±0.88	82.03±8.21	103.17±22.62	27.57±1.71	30.58±11.14	64.79±3.67	52.78±6.45	60.85±3.64	70.53±11.59
42	Ethyl hex-2-enoate	27829-72-7	1049	green fruity tropical juicy papaya quince winey rummy orange vegetable	35.15±5.5	11.63±0.58	44.82±3.16	15.14±0.95	11.7±3.58	20.9±2.41	26.72±7.4	13.08±1.11	58.47±11.24	32.13±4.29	45.08±6.76	30.56±3.79
43	2-Ethyl-1-hexanol acetate	103-09-3	1129	earthy herbal humus undergrowth	30.69±6.37	10.65±1.41	32.82±5.01	9.59±1.6	23.26±2.13	13.89±2.23	54.07±14.62	14.05±0.99	63.98±17.55	29.55±17.55	57.5±13.89	23.37±11.04
44	2-Butenoic acid, butyl ester	7299-91-4	1046		33.09±5.25	10.19±1.32	40.37±0.33	16.77±1.65	11.76±4.17	21.79±1.24	28.42±5.24	12.22±0.41	51.42±10.32	26.59±4.7	33.54±5.67	24.82±3.3
45	2-Ethylhexyl acrylate	103-11-7	1220		28.65±7.03	10.36±4.52	29.96±11.14	20.76±2.97	48.71±6.62	35.04±3.43	33.6±4.57	17.31±1.9	47.45±13.47	28.35±3.39	35.69±7.99	40.44±1.97
46	Methyl 3-methyl-2-butenoate	924-50-5	842		26.35±0.8	15±4.8	62.83±5.05	8.61±0.91	28.52±2.17	23.72±1.97	22.54±1.69	16.55±4.88	71.04±7.36	25.82±4.72	69.51±2.3	27.18±2.75
47	Isobutyl hexanoate	105-79-3	1149	fruity pineapple green apple skin green apple sour tropical peach earthy	25.22±3.6	18.98±4.48	25.33±3.17	13.54±0.87	157.34±17.62	44.03±39.65	27.08±5.68	21.81±3.43	48.44±13.01	34.97±23.33	42.99±7.92	98.64±9.37
48	Allyl benzoate	583-04-0	1254	sweet floral cherry berry	19.23±3.96	3.21±0.11	19.86±1.56	2.88±0.27	35.41±4.7	17.53±1.13	9.04±1.18	4.65±0.91	125.8±27.81	10.35±0.18	117.69±20.65	23.31±1.48
49	Isobutyl isobutyrate	97-85-8	910	ethereal fruity tropical fruit pineapple grape skin banana	21.99±1.51	26.5±4.01	49.18±4.43	9.14±1.12	0±0	21.73±12.39	16.78±1.09	26.5±4.66	59.07±3.21	41.42±2.21	57.62±0.63	22.75±2.53
50	2-Oxepanone	502-44-3	1065		17.85±1.62	21.47±2.81	17.4±1.56	12.69±2.63	11.67±1.66	15.43±0.82	12.58±2.16	9.62±2.8	12.08±1.5	19.2±2.11	11.79±3.07	16.07±1.94
51	Mono-sec-butyl phthalate	53623-59-9	1758		11.74±5.55	5.66±1.94	9.9±1.84	7.44±1.77	8.96±1.26	13.65±1.47	61.26±8.82	19.13±4.65	10.27±2.71	6.36±1.75	24.19±16.53	25.21±15.02
52	2-Methylbutyl 3-methylbutanoate	2445-77-4	1107	herbal fruity earthy cheese apple green	19.98±2.34	27.69±4.34	21.66±1.13	27.64±1.57	35.47±3.83	21.38±4.04	16.29±2.72	25.74±3.98	26.83±6.54	23.41±1.59	26.46±2.65	22.35±2.64
53	Dehydromevalonic lactone	2381-87-5	1169		16.14±2.75	17.5±1.52	18.8±1.15	21.02±1.02	47.24±0.58	25.12±2.47	21.43±2.07	15.62±2.81	25.9±1.41	20.24±1.74	28.26±2.83	29.6±1.91
54	Dimethyl phthalate	131-11-3	1454		16.12±3.49	10.43±2.47	4.15±0.72	10.49±1.43	47.13±2.59	127±6.2	20.83±1.98	2.4±0.1	6.05±1.12	8.46±0.81	5.23±1.19	11.85±0.71
55	Bornyl formate	7492-41-3	1226	green earthy herbal balsam pine	13.54±2.68	3.73±1.16	54.24±1.69	3.95±1.67	9.82±0.43	9.07±0.65	15.22±0.55	7.9±1.09	122.08±11.05	26.53±3.61	140.01±13.74	16.01±1.9
56	n-Amyl isovalerate	25415-62-7	1110	apple fresh fruity	13.23±2.66	0±0	18.9±1.23	0±0	17.73±2.34	0±0	35.93±2.18	0±0	48.86±4.13	0±0	55.19±1.91	6.1±1.22
57	Isopulegol acetate	89-49-6	1259		14.32±2.47	1.58±0.06	19.25±1.04	2.34±0.22	10.72±2.29	1.74±0.31	6.14±0.83	5.8±0.78	111.1±26.61	7.75±0.34	103.94±19.41	19.79±1.43
58	Methyl tetradecanoate	124-10-7	1725		10.46±3.26	7.74±2.87	28.11±6.37	62±11.59	2479.57±41.84	94.7±11.62	52.93±11.1	6.53±0.71	57.53±14.32	15.97±4.54	75.28±34.93	87.65±25.09
59	Butyl benzoate	136-60-7	1377	mild amber balsam fruity	13.93±2.75	32.38±8.21	13.6±0.36	32.89±3.93	112.9±5	49.48±0.89	25.72±2.62	18.75±4.27	31.12±3.37	16.77±1.18	35.16±4.16	21.17±0.41
60	1-Phenylethyl butyrate	3460-44-4	1376	sweet fruity berry juicy earthy floral jasmin	13.85±2.72	33.6±10.02	13.52±0.29	32.66±3.85	112.92±5.01	49.5±0.88	25.64±2.63	18.73±4.23	30.94±3.3	16.6±1.04	34.86±4.34	21.21±0.38
61	Ethyl 4-methylpentanoate	25415-67-2	968	fruity	13.09±1.52	10.88±0.48	17.01±0.67	10.32±0.61	13.88±0.25	10.13±0.4	17.78±0.22	16.06±1.31	22.89±1.25	13.28±2.87	23.91±0.57	12.41±1.09
62	1-(dimethylamino)propan-2-yl acetate	32188-28-6	869		16.52±1.7	8.44±1.89	13.49±1.47	9.71±0.54	0±0	3.49±0.67	10.61±0.95	5.4±0.17	18.1±0.12	7.29±1.63	13.78±1.28	4.97±2.03
63	Amyl butyrate	540-18-1	1077	sweet fruity banana pineapple cherry tropical	13.91±1.24	13.76±1.93	18.88±1.57	14.52±1.19	20.84±2.59	25.81±0.79	30.93±1.79	34.3±6.25	27±1.69	19.82±0.99	24.38±0.86	19.2±0.48
64	Fenchyl acetate	13851-11-1	1224	fresh sweet pine fir herbal citrus	10.1±2.03	1.99±0.56	40.24±0.56	2.5±0.28	5.51±2.69	6.59±0.6	11.75±1.27	5.85±1.19	88.66±8.47	18.93±2.13	99.74±9.92	11.67±1.05
65	E-2-Hexenyl benzoate	76841-70-8	1588		8.87±1.92	5.35±2.05	3.11±0.61	4.28±0.57	15.53±1.03	46.33±2.37	9.45±0.63	2.26±0.56	5.21±1.21	4.02±0.65	6.73±3.43	7.76±1.48
66	ethyl 2-phenylacetate	101-97-3	1247	sweet floral honey rose balsam cocoa	10.41±1.58	10.74±1.87	7.91±0.51	8.07±1.97	93.08±4.62	81.95±3.75	17.35±1.16	8.48±2.37	12.19±1.97	9.9±1.02	14.58±2.67	6.69±1.06
67	2-Methyl-1-butyl acetate	624-41-9	880	over ripe fruit sweet banana juicy fruit	10.43±0.25	7.34±1.18	30.86±0.79	5.96±0.32	13.25±1.09	5.05±0.99	16.33±4.32	6.82±0.87	62.2±3.66	20.09±2.72	66.6±2.62	8.39±0.57
68	cis-3-Hexenyl-.alpha.-methylbutyrate	53398-85-9	1234	fresh green apple sweet fruity pear	10±2.31	3.24±1.3	11.93±2.03	5.65±0.43	10.28±1.64	8.19±0.24	12.72±2.23	8.06±0.15	19±2.7	10.08±0.46	15.38±1.67	9.05±1.08
69	2-Methylphenyl 2-methylpropanoate	36438-54-7	1276	phenolic berry	8.47±1.97	7.86±1.48	6.49±0.55	9.92±0.96	30.98±1.76	37.89±1.67	13.24±0.42	4.93±0.65	5.84±1.61	15.42±1.02	7.29±1.32	6.53±0.6
70	Methyl 2-methylbenzoate	89-71-4	1181	floral ylang orangeflower grape	8.47±1.24	11.88±4.84	12.08±0.95	11.39±0.59	30.72±3.13	15.28±3.54	8.15±1.13	9.5±1.41	15.45±3.61	9.67±2.4	15.61±0.87	14.09±0.92
71	Butyl hexanoate	626-82-4	1192	fruity pineapple berry apple juicy green winey waxy cognac soapy	6.33±0.76	4.87±0.18	6.45±0.61	3.47±0.56	9.3±0.53	7.07±0.61	13.19±2.84	7.21±1.16	12.4±1.51	11.15±0.38	13.88±1.3	6.71±1.06
72	(Z)-2-penten-1-yl butyrate	42125-13-3	1091		7.03±1.3	5.3±0.93	5.16±0.78	3.9±0.35	9±0.87	5.57±0.56	11.44±2.01	4.48±0.18	14.7±3.69	5.31±0.74	13.62±3.01	4.2±1.05
73	n-Decyl acetate	112-17-4	1409	waxy clean fresh laundered cloths citrus soapy	5.81±1.11	0.65±0.12	3.87±0.86	1.78±0.27	2.88±0.59	3.6±0.17	5.04±0.35	4.06±0.48	5.75±1.22	3.7±0.57	3.55±0.41	4.53±0.6
74	Amyl isobutyrate	2445-72-9	1057	fruity apple banana apricot buttery	4.9±0.6	1.77±0.56	7.65±0.36	2.1±0.25	6.53±0.85	1.66±0.62	8.89±0.74	3.54±1.1	13.34±1.12	3.46±0.34	13.07±0.33	4.76±0.5
75	Ethyl 3-hydroxybutyrate	5405-41-4	943	fruity green grape tropical apple skin	3.92±0.68	4.59±0.93	6.6±0.8	3.92±0.08	5.34±0.19	2.6±0.76	5.62±0.35	5.16±0.18	5.96±0.18	4.9±0.84	7.45±0.62	5.53±0.77
76	Ethyl hexa-2,4-dienoate	2396-84-1	1094	warm fruity anise licorice ether	4.57±1.19	3.02±0.63	16.52±4.19	1.99±0.15	13.61±1.3	4.88±0.5	5.86±1.37	4.66±0.41	33.14±3.52	6.97±1.57	33.56±3.01	10.64±0.73
77	4-Methylhexyl 3-methylbutanoate	1215127-80-2	1312		3.19±0.52	2.04±0.8	2.59±0.42	2.29±0.3	1.61±0.26	2.05±0.1	3.68±0.35	3.84±1	3.66±0.81	2.55±0.69	3.85±0.73	2.45±0.71
78	3-Methyl-1-isobutylbutyl acetate	10250-45-0	1092	herbal rhubarb floral lilac banana	2.9±0.35	3.45±0.24	3.11±0.28	3.16±0.18	3.87±1.09	4.32±0.68	7.29±1.98	6.96±1.39	8.03±1.49	5.73±1.49	9.29±1.19	5.03±0.92
79	Benzoic acid methyl ester	93-58-3	1094	phenolic wintergreen almond floral cananga	2.17±0.77	7.66±1.54	4.65±0.32	12.79±0.26	18.83±0.78	19.85±3.03	3.39±0.67	5±0.49	7.75±1.36	7.14±0.99	7.52±0.07	17.94±1.77
80	Benzoic ether	93-89-0	1172	fruity dry musty sweet wintergreen	2.48±0.42	1.82±0.52	4.55±0.77	3.77±0.31	6.37±1.04	7.49±0.23	3.22±0.58	2.33±0.79	4.3±0.45	5.62±0.26	4.06±0.21	4.64±0.52
81	Methyl 3-phenylpropionate	103-25-3	1279	honey fruity wine balsam floral	2.57±0.66	3.03±0.62	1.54±0.26	3.08±0.9	13.74±0.32	16.15±1.33	3.8±0.39	1.07±0.36	1.54±0.22	3.13±0.17	2.3±0.4	2.32±0.29
82	p-Tolyl isobutyrate	103-93-5	1290	animal floral lily narcissus green fruity	2.04±0.57	3.29±0.48	1.78±0.57	4.49±0.37	14.39±0.33	15.15±1.02	3.77±0.38	1.35±0.22	1.61±0.75	2.45±0.41	2.48±0.31	2.81±0.74
83	Butyl ethanoate	123-86-4	816	ethereal solvent fruity banana	1.54±0.35	1.22±0.51	4.16±0.43	1.15±0.16	2.26±0.33	1.94±0.19	1.68±0.47	1.42±0.48	5.03±1.32	1.8±0.55	3.88±0.34	1.65±0.16
	Heterocyclic compound
84	3-Propylpyridine	4673-31-8	986	sweet musty beany earthy woody	10655.08±1239.09	19558.61±4398.05	11315.26±634.25	19715.16±2123.93	20295.91±1810.67	18528.66±368.27	19305.39±424.19	15158.52±936.09	17501.82±220.55	26690.01±360.99	16963.27±630.35	22198.19±1325.32
85	2,6-Dimethylpiazine	108-50-9	917	ethereal cocoa nutty roasted roasted meaty beefy brown coffee buttermilk	5160.28±514.18	3447.5±1012.02	8708.39±632.89	3754.22±383.04	11802.74±944.58	4487.62±171.58	9135.12±74.83	3235.11±324.05	9558.13±271.49	4405.15±68.56	8964.87±447.9	5705.15±671.36
86	5-Ethyl-2(5H)-furanone	2407-43-4	966		3492.53±359.77	2724.45±76.21	4577.76±207.86	1841.16±75.92	3225.25±88.56	1479.65±86.32	6148.93±382.26	4287.9±406.3	6965.56±401.09	3030.98±231.15	7468.42±404	2915.25±297.62
87	2-Isopropyl-5-methylpyrazine	13925-05-8	1059	green coffee nutty earthy	3244.47±432.34	867.59±45.38	6074.95±276.95	888.71±36.51	4776.3±513.19	826.35±112.19	5588.52±334.31	1183.28±50.71	9033.77±686.6	1226.97±21.43	9773.69±446.32	2419.1±339.5
88	4-Pyridinecarboxaldehyde	872-85-5	976		1790.26±184.9	1339.44±12.07	2411.3±119.75	791.25±28.04	1622.43±58.69	553.05±44.28	3375.51±219.13	2180.57±232.2	3906.82±238.81	1493.33±101.98	4208.47±252.1	1414.74±153.78
89	1,5-Diazabicyclo[3.1.0]hexane	13090-31-8	951		1549.59±117.38	1205.59±60.36	2324.33±231.47	944.26±66.65	2264.35±137.92	658.87±39.23	2154.55±74.65	1257.71±169.24	2040.93±187.63	1031.35±121.3	2199.23±208.78	1190.18±131.19
90	1-ethenyl-2-Pyrrolidinone	88-12-0	1102		805.33±203.49	664.98±161.79	748.41±57.58	821.29±110.73	624.37±68.43	638.63±23.44	840.64±78.67	788.48±33.01	837.34±235.91	818.73±248.64	701.68±55.56	647.64±106.46
91	2,6,6-Trimethyl-2-vinyltetrahydropyran	7392-19-0	972	fresh camphor herbal rosemary	747.93±77.19	590.6±20.57	998.42±49.26	426.61±16.77	691.95±17.01	355.17±15.91	1278.3±80.63	900.39±83.01	1467.99±82.87	659.27±43.4	1574.79±85.62	625.4±59.1
92	2-Butylthiophene	1455-20-5	1069	fruity floral milky fried chicken	706.9±134.69	645.23±103.84	682.08±23.94	739.23±72.95	684.18±32.7	663.42±17.27	810.76±13.7	715.08±31.71	772.16±146.08	712.85±109.37	745.51±29.46	659.35±82.05
93	2H-Pyran-2-one, tetrahydro-	542-28-9	961		500.59±50.25	387.75±4.87	633.79±26.72	262.21±9.82	462.21±13.34	195.91±12.09	863.58±45.73	604.59±49.15	956.05±52.37	461.03±38.91	1017.12±46.84	398.9±36.25
94	1,2,4,5-Tetrazin-3-Amine	79329-74-1	967		500.12±50.24	387.61±5.04	632.06±27.29	261.86±9.82	463.37±13.43	195.51±11.77	863.89±44.93	605.09±49.85	953.07±52.81	460.74±39.25	1013.09±46.04	399.58±37.07
95	Pyridine, 2-ethyl-	100-71-0	906	green grassy	368.56±25.24	280.16±24.4	451.61±42.88	284.35±27.63	567.3±40.36	262.64±5.8	527.86±21.71	245.23±4.36	465.74±18.38	276.25±1.8	466.47±14.93	319.67±21.86
96	2-Methoxy-3-isopropylpyrazine	25773-40-4	1097	pea earthy beany chocolate nutty	296.62±27.07	450.61±35.2	343.38±3.63	454.29±29.19	234.82±16.74	363.09±17.35	371.33±7.44	334.38±9.27	192.63±21.82	580.84±24.18	243.95±14.91	328.23±38.51
97	6-Pentyl-2H-pyran-2-one	27593-23-3	1453	tonka lactonic coconut creamy fatty waxy	289.06±67.33	183.07±52.94	77.24±10.61	194.94±16.36	943.57±47.54	2607.74±141.37	406.47±33.78	27.88±3.52	102.1±19.84	141.99±15.84	88.96±17.81	217.65±12.42
98	2,5-Furandione, dihydro-3-methyl-	4100-80-5	1057		231.75±34.2	192.55±21.24	224.09±7.8	213.04±16.15	207.85±22.73	181.06±2.29	229.5±15.99	179.7±6.37	220.71±36.4	184.58±24.43	220.72±21.49	172.35±15.76
99	Pyridine, 2,3,4,5-tetrahydro-6-propyl-	1604-01-9	1028		202.21±20.24	196.58±24.31	200.2±5.91	199.12±15.86	187.09±1.96	206.66±3.81	162.11±3.99	206.56±5.28	187.06±15.03	185.8±14.63	184.92±2.51	199±19.72
100	2,2'-Bifuran, octahydro-	1592-33-2	1079		218.63±23.5	176.18±7.55	213.23±21.01	154.25±8.12	194.88±45.07	95.83±8.93	144.1±22.86	121.74±12.63	141.25±12.43	108.81±6.55	141.81±14.03	79.98±14.72
101	Pyridine, 2,3-dimethyl-	583-61-9	943		158.28±3.25	167.69±14.18	200.21±15.23	171.47±6.34	223.51±18.28	180.08±8.44	174.07±16.73	140.57±11.52	190.32±11.86	153.88±5.89	190.59±7.94	241.18±11.69
102	2-Methyl-3(2-furyl)acrolein	874-66-8	1114	cinnamon woody herbal	134.38±24.5	22.51±4.16	208.41±18.84	15.35±1.3	228.63±27.35	31.55±1.51	384.38±37.86	38.19±3.6	581.14±38.32	31.81±2.45	655.12±20.43	65.3±12.56
103	2-n-Hexylpyridine	1129-69-7	1284	green fatty mutton	134.06±24.7	140.1±25.85	129.12±8.03	179.57±16.73	436.21±8.22	555.78±22.42	221.74±3.45	82.44±5.4	124.86±26.46	291.88±14.77	140.37±18.06	134.77±5.65
104	1,7-Diazabicyclo[2.2.0]heptane	279-42-5	939		94.07±1.54	60.95±11.71	188.81±18.44	35.21±2.62	108.25±10.11	76.04±16.32	66.06±10.22	71.28±16.14	217.98±22.78	87.54±16.2	230.99±2.62	116.87±16.12
105	cis-3-Methyl-4-octanolide	55013-32-6	1337	sweet spicy coconut vanilla	79.15±13.34	49.63±5.89	89.47±7.67	52.24±6.14	111.28±3.66	82.14±1.5	116.19±7.27	116.73±27.37	106.68±10.96	86.18±5.05	110.76±8.38	66.4±3.19
106	2-Acetyl-5-methylfuran	1193-79-9	1039	strong musty nutty hay coconut coumarin milky	72±8.9	77.82±9.16	104.25±11.13	75.95±4.71	148.8±12.4	78.89±4.05	113.68±4.51	65.79±3.54	94.66±6.95	71.42±5.77	97.53±5.3	76.54±6.65
107	Thiazole	288-47-1	735	pyridine nutty meaty	60.66±7.59	60.16±2.71	48.22±4.95	45.25±4.51	62.75±5.72	56.09±3.61	70.19±3.42	47.43±10.24	58.38±1.78	63.85±12.62	65.33±3.81	53.72±9.86
108	3-Ethyl-2,5-dimethylpyrazine	13360-65-1	1081	potato cocoa roasted nutty	50.35±3.41	48.61±1.21	64.37±3.5	49.09±2.21	54.13±16.11	22.03±1.98	49.44±15.94	28.6±0.93	76.95±8.87	51.41±4.08	86.16±4.51	46.34±2.73
109	3,5-Dimethyl-2-ethylpyrazine	13925-07-0	1084	burnt almonds roasted nuts coffee	50.34±3.41	47.72±1.71	64.4±3.55	48.65±2.37	53.7±15.86	21.72±2.21	50.75±14.19	27.79±2.04	78.54±7.96	52.34±2.65	86.25±4.52	46.27±2.82
110	Ketone, methyl 2,4,5-trimethylpyrrol-3-yl	19005-95-9	1303		35.04±5.8	36.9±11.38	64.08±5.39	68.36±11.59	86.11±5.74	57.01±1.65	45.91±7.27	29.45±3.38	42.48±8.86	33.34±1.39	60±7.81	32.69±6.74
111	2,2'-Isopropylidenebis(5-methylfuran)	59212-75-8	1458		39.61±8.75	24.23±6.87	9.69±1.42	24.25±1.97	108.45±5.89	285.78±17.25	47.99±3.71	3.78±0.31	12.87±2.24	17.82±1.85	10.77±1.72	25.82±1.75
112	3-Methyl-1-(3-methyl-2-furyl)-1-butanone	488-05-1	1201		33.3±6.1	16.47±6.22	97.81±3.28	21.53±2.48	62.33±2.31	36.83±2.01	39.89±0.78	21.1±1.86	137±23.13	39.53±1.89	172.19±9.39	49.06±7.6
113	2-Ethoxy-3-methylpyrazine	32737-14-7	1065	hazelnut roasted almonds pineapple earthy	35.17±0.79	63.91±3.22	51.57±3.28	38.4±3.05	29.27±1.08	38.18±1.64	24.34±3.95	38.64±1.34	31.55±6.36	51.68±1.67	34.98±5.13	41.82±0.82
114	Furan, 2-propyl-	4229-91-8	791		33.6±1.58	44.12±16.61	41.87±7.11	8.5±1.38	27.79±2.38	68.76±6.54	18.27±1.9	22.07±5.46	30.32±1.99	43.04±5.31	28.5±2.4	40.32±6.5
115	1-(pyridin-3-yl)ethanone	350-03-8	1112	sweet nutty dry hawthorn phenolic woody popcorn	27.57±5.48	6.75±1.76	36.02±1.6	8.04±1.34	46.83±3.34	13.8±2.15	58.11±5.6	10.7±0.4	79.58±3.74	9.93±1.1	87.93±3.09	18.47±2.21
116	Maltol	118-71-8	1110	sweet caramel cotton candy jam fruity baked bread	29.65±1.95	22.63±2.59	27.67±3.35	21.34±0.87	26.57±4.95	14.1±2.24	30.69±1.6	19.08±2.49	31.64±1.46	14.71±1.52	34.03±0.58	11.98±1.88
117	Furan, 2-butyltetrahydro-	1004-29-1	1004		29.52±3.32	0±0	34.61±7.03	45.47±4.89	276.93±2.48	97.89±15.97	31.68±9.17	4.87±1.55	56.15±10.75	40.24±2.13	56.59±8.56	56.99±5.74
118	2,4-Methylthiazole	541-58-2	883	coffee tea beefy roasted barley	29.32±4.26	17.94±2.7	24.11±1.5	13.25±1.31	24.15±7.87	9.48±2.18	21.28±5.6	12.3±1.97	17.6±0.36	19.07±3.17	18.09±2.65	14.6±2.26
119	Azacyclohexan-3-one, 1,5,6-trimethyl-	339590-59-9	1126		26.74±3.97	17.53±1.62	36.23±3.38	16.43±1.31	32.45±2.02	17.81±2.95	39.82±8.07	21.15±2.92	49.52±3.86	28.81±4.37	51.82±2.82	19.39±2.73
120	2,3-Dimethyl-1,4-diazine	5910-89-4	920	nutty nut skin cocoa peanut butter coffee walnut caramellic roasted	20.66±0.52	18.97±6.92	68.15±5.2	23.93±0.68	95.58±3.04	42.16±3.5	35.87±1.71	8.46±1.07	96.6±5.48	32.57±3.14	95.91±5.02	38.98±5
121	2,5-Pyrrolidinedione, 1-ethyl-	2314-78-5	1191		20.77±3.26	13.69±1.14	21.74±1.71	11.4±1.49	25.13±1.06	21.47±1.19	31.6±4.12	19.63±2.77	32.48±2.09	26.46±1.87	32.19±2.93	17.77±2.27
122	1-(Furan-2-yl)-2-methylpentan-1-one	1248070-62-3	1268		19.76±3.37	19.86±0.52	8.3±0.91	12.46±0.92	142.48±7.36	148.28±7.34	29.2±3.53	4.77±0.82	8.33±0.99	17.17±1.92	10.69±1.49	11.04±1.2
123	1,2,4-Triazine-3,5(2H,4H)-dione	461-89-2	1066		13.35±3.69	21.75±1.32	16.58±1.37	12.73±0.44	10.19±0.84	14.18±1.7	11.83±0.53	13.38±0.75	11.74±1.02	18.12±3.68	9.65±4.1	10.51±0.36
124	Hygrine	496-49-1	1092		16.06±2.54	13.2±0.74	29.5±6.89	10.68±0.74	17.06±2.23	6.79±1.69	16.46±2.67	13.58±1.12	48.25±5.84	22.01±1.74	48.77±3.41	21.83±0.71
125	2-Acetyl-3-ethylpyrazine	32974-92-8	1168	earthy potato chip nutty popcorn corn	15.9±3.17	17.19±6.54	21.4±3.83	26.99±4.53	46.04±4.35	32.77±0.49	21.83±1.32	14.21±0.92	26.27±5.65	27.6±1.9	24.65±3.7	32.09±1.57
126	1-Pentanone, 1-(1H-imidazol-4-yl)-	69393-15-3	1371		11.93±4.1	13.95±7.46	7.61±2.5	24.53±4.92	26.23±3.32	20.82±1.92	19.55±2.85	19.61±3.4	11.31±2.94	13.65±2.32	9.35±3.25	14.96±1.75
127	1-(1H-Pyrrol-2-yl)ethanone	1072-83-9	1063	musty nut skin maraschino cherry coumarinic licorice walnut bready	10.48±1.42	16.96±3.62	22.13±0.41	17.11±0.02	17.25±1.05	10.79±0.64	13.71±3.63	10.33±1.04	59.72±6.45	11.96±0.76	70.84±1.63	12.15±0.61
128	1-thiophen-2-yl-ethanone	88-15-3	1092	sulfurous nutty hazelnut walnut	10.59±1.74	14.56±2.48	13.22±0.93	11.82±1.59	20.97±0.99	13.12±1.06	22.96±1.58	9.97±0.3	20.32±2.61	10.54±0.13	22.57±1.54	12.88±0.61
129	5-Thiazoleethanol, 4-methyl-	137-00-8	1278	fatty cooked beef juice	10.23±2.69	7.29±1.52	8.21±0.76	9.2±1.13	30.01±1.5	38.69±1.96	14.21±0.53	6.76±1.17	9.57±3.66	13.81±1.17	8.32±1.38	7.89±0.94
130	Ethanethioic acid, S-(2-furanylmethyl) ester	13678-68-7	1172	sulfury burnt roasted nutty coffee	8.04±1.09	7.06±1.34	13.41±0.95	10.38±0.51	17.78±0.58	18.32±0.9	12.35±1.44	8.2±2.08	13.77±1.82	17.09±0.95	17.97±2.74	15.78±4.56
131	2-Acetyl-3-methylpyrazine	23787-80-6	1082	nutty nut flesh roasted hazelnut toasted grain corn chip vegetable nut skin caramellic	7.18±0.53	9.5±0.46	9.38±0.25	8.95±1.09	21.66±2.27	17.83±0.87	11.8±0.72	6.75±0.52	10.33±1.07	11.57±0.49	12.25±0.47	7.2±0.19
132	2(5H)-Furanone	497-23-4	918	buttery	6.69±0.17	6.16±0.47	0±0	6.23±0.32	26.75±2.35	8.6±0.97	11.13±0.51	6.65±1.95	0±0	10.66±1.46	0±0	8.4±0.81
133	Ethanone, 1-(3,5-dimethylpyrazinyl)-	54300-08-2	1174	nutty roasted hazelnut	5.21±1.53	5.41±2.37	6.99±0.72	9.32±1.44	15.11±1.68	8.69±0.94	7.32±0.72	4.87±0.05	10.75±1.76	9.65±0.94	8.83±1.13	9.97±0.6
134	2-Amylfuran	3777-69-3	993	fruity green earthy beany vegetable metallic	6.42±0.88	4.92±0.8	43.33±0.67	5.14±0.38	16.53±1.51	5.48±0.57	10.44±1.53	6.85±1.37	70.19±7.41	14.18±1.17	67.09±3.81	9.64±0.05
135	2-((3,3-Dimethyloxiran-2-yl)methyl)-3-methylfuran	92356-06-4	1176	green earthy citrus	4.69±1.44	6.36±1.2	5.48±1.08	6.67±0.92	20.52±2.67	7.67±0.44	7.43±1.9	5.37±0.62	11.15±2.4	8.23±1.37	10.14±2.06	11.59±1.09
136	2-(2-Acetoxy-1-propyl)furan, (S)	60830-70-8	1143		5.57±1.47	3.26±1.49	12.61±1.95	6.82±2.02	13.33±1.76	10.78±0.12	7.49±0.66	2.91±0.63	13.24±1.67	10.24±0.08	16.06±0.59	11.55±0.99
137	2H-Pyran-2-one, tetrahydro-6-methyl-	823-22-3	1095	creamy fruity coconut	4.41±0.79	5.33±1.35	6.42±1.44	3.53±0.92	6.12±0.73	2.79±0.77	4.46±0.68	4±0.22	9.57±0.9	4.87±0.14	9.48±1.05	6.05±0.74
138	Hydroperoxide, 1,4-dioxan-2-yl	4722-59-2	1019		5.34±0.95	8.52±5.4	6.3±1.2	5.84±2.27	6.41±1.2	7.33±0.63	7.46±2.27	9.12±3.45	9.4±0.57	8.48±2.78	5.74±1.68	7.34±1.5
139	2(1H)-Pyridinone	142-08-5	1094		4.91±1.41	2.9±0.73	16.86±4.37	1.89±0.29	15.62±1.64	5.71±0.8	5.69±1.13	4.51±0.33	32.09±4.96	6.97±1.57	31.79±4.21	10.83±0.89
140	(3R,6R)-2,2,6-Trimethyl-6-vinyltetrahydro-2H-pyran-3-ol	14009-71-3	1171	citrus green	4.09±0.31	3.2±0.11	4.21±0.39	1.98±0.31	7.43±0.46	3.58±0.33	6.97±0.67	3.72±0.33	7.39±0.71	6.61±0.27	7.64±1.1	3.92±0.4
141	2(3H)-Furanone, 5-(acetyloxy)dihydro-5-methyl-	57681-51-3	1226		4.59±0.54	2.1±0.2	11.01±0.71	3.75±0.06	17.43±1.27	4.36±0.54	4.67±0.61	2.54±0.19	19.18±2.26	5.62±0.87	23.34±2.87	4.89±0.82
142	2-Acetyl-2-thiazoline	29926-41-8	1106	corn chip taco potato chip toasted bread nutty	4.29±0.63	1.59±0.42	8.26±0.73	2.93±0.5	6.4±0.38	7.33±0.62	5±0.24	1.34±0.24	14.35±2.5	2.77±0.02	14.6±1.32	4.21±0.7
143	5-Ethyl-3-hydroxy-4-methylfuran-2(5H)-one	698-10-2	1195	sweet fruity caramellic maple fenugreek brown sugar nutty chicory praline butterscotch	3.16±0.46	2.13±0.08	2.81±0.91	1.22±0.01	2.71±0.3	2.95±0.34	5.66±0.6	3.48±0.71	4.08±0.31	4.63±0.82	3.72±0.66	2.49±0.45
144	2-Methyl-5,6-diethylpyrazine	18138-04-0	1158	musty nut skin earthy roasted hazelnut toasted potato dusty foliage vegetable	2.7±0.14	3.69±0.44	4.27±0.93	3.58±0.23	7.56±0.71	6.9±0.66	3.37±0.22	2.55±0.84	5.42±0.41	3.54±0.39	4.08±0.98	2.72±0.25
145	Pyridine, 2-methyl-	109-06-8	816	sweat	1.6±0.17	1.89±0.38	2.03±0.41	0.81±0.3	1.69±0.12	2.35±0.64	1.37±0.22	0.97±0.22	2.39±0.25	2.8±0.24	2.28±0.18	2.33±0.05
146	2-Methyl-1,3-dithiacyclopentane	5616-51-3	1026	sulfurous alliaceous smoky savory vegetable	2.71±0.63	3.54±0.28	3.77±0.97	3.55±0.45	3.98±0.58	4.66±0.43	7.81±3.2	5.72±1.59	6.23±0.86	5.55±1.83	6.87±1.57	5.05±1.46
	Ketone
147	5-Methyl-(E)-2-hepten-4-one	102322-83-8	972	hazelnut nutty	6038.35±609.34	4569.41±97.25	7954.62±374.27	2932.55±99.03	5575.99±234.95	2178.04±148.48	11082.9±670.13	7356.84±650.21	12484.36±734.6	5159.45±357.43	13443.3±723.92	4886.65±439.55
148	Bicyclo[3.1.0]hex-3-en-2-one, 5-(1-methylethyl)-	36262-12-1	1117		971.53±170.41	180.03±33.23	1383.43±99.07	113.82±13.25	1451.43±166.21	212.27±12.93	2422.52±218.56	292.97±24.57	3425.13±174.01	241.27±18.58	3829.12±74.14	458.65±83.58
149	Camphenone, 6-	55659-42-2	1114		963.18±164.76	176.85±36.09	1381.84±103.17	115.98±11.88	1433.17±182.86	206.56±14.25	2408.15±215.7	286.22±22.38	3417.16±177.09	237.2±19.99	3800.93±59.89	436.62±82.31
150	4-Acetylanisole	100-06-1	1348	sweet hawthorn anisic powdery balsamic acacia	602.59±156.84	397.87±115.76	731.28±53.55	671.51±71.3	584.03±43.74	559.64±36.51	675.72±28.88	560.64±88.31	771.09±200.37	757±63.03	810.34±137.84	552.76±43.96
151	1-Hepten-6-one, 2-methyl-	10408-15-8	966		577.2±58.63	460.43±12.79	761.68±36.47	303.85±10.29	539.81±13.56	241.98±16.99	1033.32±65.54	703.68±64.18	1176.49±68.48	492.54±30.5	1257.7±78.16	475.44±56.41
152	Isopropenyl ethyl ketone	25044-01-3	748		379.52±19.47	240.56±37.83	501.17±31.99	124.88±1.33	187.27±4.25	157.3±15.52	276.29±10.2	883.58±158.16	627.36±55.54	356.56±53.79	621.01±28.26	254.19±25.59
153	3,4-Hexanedione, 2,2,5-trimethyl-	20633-03-8	1039		283.07±13.11	231.35±18.21	274.87±10.4	221.44±3.12	304.39±45.78	129.51±9.92	227.32±14.02	171.72±12.48	207.14±0.83	158.89±4.75	223.58±5.99	151.25±9.55
154	3-Octen-2-one	1669-44-9	1040	earthy spicy herbal sweet mushroom hay blueberry	244.93±26.88	259.48±30.4	342.01±29.9	247.66±13.61	484.63±51.11	218.85±6.93	366.52±9.96	210.5±5.79	308.84±27.4	225.07±12.64	330.12±9.57	244.18±19.54
155	2-Oxetanone, 4-methyl-	3068-88-0	732		223.94±28.61	246.72±30.26	211.57±13.85	235.73±15.7	247.36±4.91	253.66±6.87	288.13±36.59	207.67±49.79	223.97±3.52	219.42±25.48	254.18±8.22	227.36±27.17
156	Cyclopentanone, 2-methyl-3-(1-methylethyl)-	54549-81-4	1028		189.86±18.38	191.19±25.98	190.02±6.2	191.9±14.79	180.47±2.15	196.32±3.53	148.76±4.85	188.75±2.97	181.25±13.77	183.71±14.94	181±2.88	193.39±17.86
157	1,2-Cyclohexanedione	765-87-7	1062	sweet acorn nut skin maple caramel brothy	193.23±15.87	145.86±8.7	182.99±5.27	155.05±9.69	136.25±36.5	65.79±3.85	150.83±23.96	79.02±8.94	125.94±6.78	92.67±9.87	139.67±30.86	77.88±4.7
158	2,6,6-Trimethylbicyclo[3.2.0]hept-2-en-7-one	4613-37-0	1108		123.63±32.1	101.63±24.37	117.02±9.45	126.57±16.57	89.37±8.83	96.42±2.85	133.81±9.94	124.94±6.37	133.61±38.5	122.99±33.6	117.56±11.2	98.32±15.09
159	2,7-Nonadien-5-one, 4,6-dimethyl-	74630-80-1	1138		131.24±14.68	106.59±11.19	122.66±12.15	101.36±7	106.59±18	93.14±9.01	145.04±19.78	135.85±14.03	119.01±9.88	116.46±14.35	109.36±21.24	70.34±9.14
160	3,7-Nonadien-2-one, 8-methyl-, (E)-	35408-14-1	1144		120.03±18.61	62.47±16.45	196.7±5.74	124.84±11.45	227.54±7.52	211.49±4.57	114.82±1.01	66.89±5.64	169.64±7.54	139.68±11.65	198.69±16.79	160.16±9.18
161	Acetophenone, 4'-hydroxy-	99-93-4	1455	mild sweet hawthorn balsam mimosa	113.62±25.05	72.99±19.77	31.01±4.34	79.12±7.66	333.69±18.92	871.39±44.61	150.86±11.38	12.01±1.11	40.75±7.95	57.34±6.88	35.43±6.55	82.55±6.65
162	Bicyclo[3.1.1]heptan-2-one, 6,6-dimethyl-	24903-95-5	1137		99.48±13.78	65.7±7.92	134.04±11.1	60.11±5.27	86.23±8.58	61.65±5.08	113.03±18.84	82.68±12.27	158.53±5.68	95.73±4.78	170.32±14.26	51.66±9.52
163	5,9-Undecadien-2-one, 6,10-dimethyl-	689-67-8	1452	fresh rose leaf floral green magnolia aldehydic fruity	85.51±19.21	53.82±14.29	22.79±3.5	55±6.05	228.58±13.12	575.16±25.54	106.06±6.96	10.3±1.95	29.15±4.82	40.24±4.19	25.9±4.96	58.43±4.86
164	Thymoquinone	490-91-5	1250		76.24±14.93	8.86±3.63	84.26±5.42	13.59±2.82	73.04±8.77	20.06±0.81	32.91±1.81	27.36±1.81	578.24±132.81	46.52±3.29	529.63±96.2	104.94±1.82
165	1,1'-(1,4-phenylene)bis-Ethanone	1009-61-6	1461		70.26±13.23	46.85±11.74	19.03±2.51	46.32±4.41	188.12±9.11	461.88±27.2	89.5±6.05	8.49±0.91	25.16±4.61	35.96±4.16	20.87±3.62	48.33±4.32
166	1-Decen-3-one	56606-79-2	1141		63.9±5.31	33.33±1.35	117.66±7.29	33.67±3.4	59.61±5.75	40.97±2.74	55.81±8.88	39.03±6.55	149.36±5.75	61.48±4.61	152.14±17.33	38.15±4.76
167	Acetophenone	98-86-2	1065	sweet hawthorn mimosa almond acacia	54.09±4.05	67.72±4.65	88.94±0.92	134.35±6.08	168.59±3.21	145.18±3.11	92.84±6.12	49.74±3.57	104.86±10.09	66.88±3.03	117.31±3.56	124.82±11.59
168	Cyclohexanone, 2,2,6-trimethyl-	2408-37-9	1036	pungent thujone labdanum honey cistus	41.7±3.44	44.4±3.35	52.95±3.97	44.94±2.2	76.32±5.65	40.16±1.85	62.43±3.11	42.07±1.37	50.82±5.06	35.2±1.59	55.16±1.72	41.63±3.45
169	Ethanone, 1-(4-ethylphenyl)-	937-30-4	1277	floral hawthorn	42.26±6.93	42.53±3.76	13.77±0.38	27.55±2.61	273.12±13.51	327.96±15.89	67.01±8.86	9.04±1.22	17.62±2.89	41.36±3.66	21.87±1.45	26.48±3.49
170	2-Propanone, 1-(4-methoxyphenyl)-	122-84-9	1385	sweet fruity creamy spicy green anisic balsamic licorice fennel	40.55±7.93	24.02±8.79	45.52±6.64	59.85±2.36	80.12±5.67	73.91±2.23	36.98±3.4	19.45±1.7	47.2±11.84	62.16±2.83	45.85±9.63	56.97±3.32
171	7-Oxabicyclo[4.1.0]heptan-2-one, 6-methyl-3-(1-methylethyl)-	5286-38-4	1256		37.01±6.18	14.53±1.6	45.78±3.89	21.86±2.36	55.07±3.83	30.55±2.94	33.53±0.96	23.18±4.51	64.59±10.4	29.6±0.83	61.75±5.44	28.77±3.43
172	(E)-Oct-3-en-2-one	18402-82-9	1035		32.53±5.05	26.02±3.03	35.11±3.51	36.01±2.2	62.48±5.41	30.57±2.07	47.43±3.88	23.75±0.5	35.62±3.97	29.89±0.49	32.03±1.78	35.71±3.66
173	7-methyloct-3-en-2-one	33046-81-0	1113	fruity floral	29.53±4.11	16.76±1.56	38.93±3.16	15.28±1.09	23.52±4.35	12.03±0.54	25.97±3.15	13.3±2.05	23.86±3.99	12.95±1.26	23.15±3.14	13.18±1.1
174	spiro[3-oxatricyclo[3.3.1.02,4]nonane-8,1'-cyclopropane]-6-one	109637-57-2	1198		28.09±5.99	10.09±2.49	29.99±2.14	12.31±1.17	59.83±2.75	50.86±2.3	24.42±0.48	15.15±2.12	60.79±7.02	18.02±0.66	68.29±9.19	18.53±0.73
175	Ethanone, 1-(2-methyl-1-cyclopenten-1-yl)-	3168-90-9	996		25.73±2.51	12.25±0.65	120.71±3.44	26.75±9.2	91.65±2.44	20.22±1.65	43.77±2.1	16.66±2.55	209.2±14.17	37.76±2.89	226.51±4.38	40.42±2.17
176	Methyl Isobutyl Ketone	108-10-1	735	sharp solvent green herbal fruity dairy spice	22.21±3.26	31.7±3.71	22.8±1.69	30.35±2.99	26.86±2.88	30.59±0.59	34.54±4.05	25.13±8.21	22.3±1.13	22.98±5.25	26.93±1.28	23.78±2.85
177	3-Chloro-2,4-pentanedione	1694-29-7	931		19.82±0.22	17.16±1.63	21.61±1.55	15.26±0.73	16.96±5.49	8.27±0.15	11.48±3.6	7.65±0.29	9.75±0.67	6.87±1.18	10.83±0.44	5.23±0.04
178	Isophorone	78-59-1	1124	cooling woody sweet green camphor fruity musty cedarwood tobacco leather	14.08±2.06	10.19±2.4	12.65±2.34	10.32±1	24.11±4.47	27.04±7.83	17.08±2.58	8.28±0.7	27.67±6.61	19.41±2.29	21.7±5.89	27.6±4.3
179	1-Pentanone, 1-phenyl-	1009-14-9	1374	balsam valerian	13.65±2.71	33.21±10.29	13.46±0.24	31.28±3.41	112.92±5.01	49.49±0.88	25.38±2.73	17.61±5.2	30.83±3.26	16.34±1.12	34.85±4.35	21.17±0.38
180	Norbornadieone	10218-02-7	913		14.34±1.27	6.47±1.23	32.56±3.75	14.81±1.36	42.87±1.7	15.92±2.36	10.19±0.35	10.23±0.36	35.15±1.24	10.46±2.1	37.43±1.56	17.55±1.67
181	6-bromo-2-Hexanone	10226-29-6	1050		11.67±0.44	6.15±0.77	15.78±0.97	8.18±1.47	23.49±0.39	10.82±0.76	16.2±3.5	13.32±3.05	27.08±3.06	14.66±2.08	28.76±0.92	10.75±2.11
182	4-Hexen-3-one, 5-methyl-	13905-10-7	1080		9.74±1.1	9.82±0.9	9.51±1.17	6.09±0.43	0±0	2.93±0.35	8.32±1.2	8.28±1.24	7.19±0.42	5.78±0.59	6.23±0.51	2.7±0.71
183	2-Acetyl-4,4-dimethyl-cyclopent-2-enone	81979-96-6	1213		8.46±1.38	5.33±0.53	8.13±1.52	7.41±1.37	7.16±1.05	7.82±1.06	7.08±1.68	5.57±1.69	4.97±1.13	5.8±0.44	4.73±0.51	4.63±1.04
184	Ethanone, 1-(3-methylphenyl)-	585-74-0	1182		8.36±1.62	11.72±5.35	11.5±1.11	11.33±0.16	30.53±2.74	17.98±1.12	8.28±0.98	9.45±1.3	16.12±2.91	9.7±2.31	15.5±1.56	13.83±0.85
185	6,8-Nonadien-2-one, 8-methyl-5-(1-methylethyl)-, (E)-	54868-48-3	1373		7.24±2.53	11.32±4.23	6.07±1.08	16.47±2.33	28.38±1.9	18.4±0.84	12.65±0.73	9.97±2.49	10.43±1.78	8.18±1.61	10.75±1.08	10.23±0.52
186	4-Undecanone	14476-37-0	1208	fruity	9.35±1.08	8.2±1.2	10.91±1.16	8.21±0.62	11.77±2.32	8.43±0.58	12.61±1.54	10.1±2.31	12.28±0.75	8.83±0.97	13.35±1.34	7.62±1.12
187	2,4-Dimethylacetophenone	89-74-7	1253	floral woody sweet mimosa minty	7.24±1.4	2.21±0.53	8.24±0.74	1.85±0.05	16.42±1.41	9.05±0.46	4.54±0.59	2.1±0.2	39.31±8.61	3.39±0.61	37.82±5.57	7.18±0.93
188	Ethanone, 1-(3-hydroxyphenyl)-	121-71-1	1439		3.26±0.54	2.48±0.65	1.58±0.22	2.71±0.09	9.85±0.59	17.67±1.31	4.85±0.25	1.55±0.71	2.76±0.32	1.6±0.29	2.31±0.58	3.07±0.13
189	4-Methyl-3-penten-2-one	141-79-7	798	pungent earthy vegetable acrylic	2.79±0.31	1.89±0.28	6.79±0.47	2.95±0.39	21.43±1.05	4.03±0.92	2.12±0.52	2.12±0.57	8.01±0.88	4.12±0.36	6.99±1.02	5.34±0.34
190	6,10-dimethylundecan-2-one	1604-34-8	1408		2.44±0.75	0.36±0.08	1.83±0.44	0.78±0.2	0.5±0.18	1.51±0.1	2.42±0.29	1.9±0.26	1.97±0.37	1.59±0.1	1.61±0.18	1.87±0.55
191	3-Buten-2-one, 4-phenyl-	122-57-6	1236	sweet spice cinnamon balsam rhubarb creamy floral	1.59±0.22	2.11±0.75	5.16±0.3	2.76±0.77	5.79±0.64	3.73±0.49	1.48±0.32	2.05±0.29	9.17±1.79	2.95±0.24	10.64±1.04	2.94±0.48
192	2-Methylacetophenone	577-16-2	1173	sweet hawthorn powdery anisic coumarinic phenolic burnt nutty honey	1.42±0.43	1.44±0.36	1.62±0.72	1.17±0.26	6.51±0.67	5.99±0.29	3.34±0.29	0.72±0.62	1.43±0.37	2.3±0.46	1.64±0.33	3.04±0.38
	Hydrocarbons
193	4-methyl-1-(1-methylethyl)-Bicyclo[3.1.0]hex-2-ene	28634-89-1	966		16324.94±1704.31	12239.77±101.91	21643.87±945.49	7276.39±255.14	14831.26±519.24	0±407.66	29554.09±1807.41	19816.48±2059.48	33476.43±1765.18	0±923.78	0±1930.43	0±1473.28
194	Octane, 2,6,6-trimethyl-	54166-32-4	966		15132.18±1516.71	11281.9±46.51	19969.76±862.72	6824.91±234.4	13864.81±526.96	4922.14±372.65	27389.16±1656.6	18128.65±1881.6	30798±1560.19	12912.99±837.09	33067.61±1679.99	12299.29±1239.1
195	Bicyclo(3.3.1)non-2-ene	6671-66-5	964		6484.85±685.41	4818.14±55.63	8740.97±378.9	2863.49±112.38	5900.08±208.15	1965.86±190.54	12192.63±802.78	7939.74±890.12	13988.1±828.92	5469.99±393.75	15022.94±872.92	5314.27±590.89
196	Cyclopentene, 1-butyl-	2423-01-0	938		1390.74±112.68	1549.29±107.98	2086.47±214.92	1243.67±52.46	1820.54±102.26	923.31±67.98	1740.55±75.58	1445.9±128.14	1803.17±152.99	1500.27±122.45	1860.87±182.3	1458.85±171.67
197	Cyclohexene, 6-(2-butenylidene)-1,5,5-trimethyl-, (E,Z)-	71186-24-8	1336		844.78±413.76	480.13±211.52	680.35±98.11	778.9±104.92	468.18±54.55	440.06±27.56	1135.04±136.67	1171.47±355.28	856.83±394.68	726.92±389.49	836.75±365.1	491.42±155.29
198	Decane, 5-methyl-	13151-35-4	1057		1056.01±77.17	731.33±67.86	982.87±50.01	734.48±60.78	632.83±287.31	415.46±33.5	547±182.52	247.86±37.64	404.93±18.34	369.37±6.27	519.32±262.75	287.48±29.63
199	Cyclohexene, 4-ethenyl-	100-40-3	829		576.31±30.32	644.78±33.55	499.37±1.68	637.27±26.19	526.83±27.26	660.71±5.82	553.63±23.04	562.31±39.91	430.56±5.65	593.06±44.84	437.98±38.77	558.91±49.07
200	2-Methyl-7-exo-vinylbicyclo[4.2.0]oct-1(2)-ene	107914-89-6	1112		364.33±56.85	94.9±19.5	479.27±24.14	93.97±4.87	586.19±54.19	132±9.39	721.74±62.05	121.1±6.46	963.43±42.45	126.03±7.73	1093.65±34.97	207.49±33.88
201	Nonane, 2-methyl-	871-83-0	964		320.26±34.62	236.89±6.37	390.19±20.14	188.3±8.14	278.13±7.61	169.11±3.13	508.63±18.35	371.95±23.51	558.17±38.5	306.36±30.8	582.28±32.85	257.03±17.83
202	Decane, 2,5,9-trimethyl-	62108-22-9	1121		353.9±35.55	264.72±24.11	331.46±39.17	249.56±17.12	316.26±75.06	205.49±31.66	231.27±46.88	178.16±27.69	252.86±23.2	184.69±12.79	225.42±16.25	182.93±29.18
203	1,3-Hexadiene, 3-ethyl-2-methyl-	61142-36-7	1031		298.66±26.6	514.96±70.31	403.73±34.57	579.77±23.59	692.71±76.65	494.61±34.21	411.41±10.68	301.5±28.4	357.09±42.39	473.34±41.03	362.3±24.79	492.45±33.02
204	Nonane, 3,7-dimethyl-	17302-32-8	1038		290.59±16.96	231.14±17.92	280.26±10.42	223.11±3.42	304.39±45.78	137.51±8.5	239.52±17.74	178±13.11	217.85±4.73	165.53±5.44	223.76±5.94	155.45±10.39
205	trans-3,4-Epoxyoctane	28180-72-5	869		266.99±30.12	163.4±17.01	248.48±17.54	151.91±4.87	149.27±72.33	93.97±15.82	121.13±25.41	51.24±3.05	157.14±8.39	99.19±15.92	140.79±38.45	92.52±17.85
206	Heptane, 3-ethyl-2-methyl-	14676-29-0	941		212.12±8.5	179.75±11.06	282.55±18.36	162.87±15.83	220.08±21	154.22±9.66	237.59±18.18	187.45±17.28	226.09±41.33	191.79±14.64	212.61±15.29	187.83±18.62
207	Cyclohexene, 2,4-dimethyl-1-(1-methylethenyl)-	56763-60-1	1108		198.27±50.52	166.21±40.95	189.46±13.61	207.71±30.53	149.48±19.83	163.03±13.05	218.77±18.61	203.87±9.34	225.82±63.13	199.66±55.43	194.25±19.25	156.19±23.44
208	Octane, 3,3-dimethyl-	4110-44-5	932		215.16±22.24	154.79±23.89	189.65±30.75	111.79±6.61	187.41±47.51	93.33±9.97	154.35±23.6	91.38±7.38	148.16±13.62	127.91±25.29	150.27±27.11	77.64±22.25
209	Undecane, 4,4-dimethyl-	17312-68-4	1229		166.31±51.88	62.49±21.98	270.01±82.3	126.68±22.89	635.45±110.91	258.23±36.96	223.33±50.63	78.86±8.53	647.27±223.66	221.12±53.28	565.18±157.22	364.58±47.5
210	Santolina triene	2153-66-4	908		159.36±15.39	100.84±5.7	239.25±13.96	62.52±2.11	171.19±5.83	88.34±31.43	337.53±32.2	160.42±18.99	406.22±27.95	114.44±7.11	442.83±28.52	117.04±13.42
211	1,3,5-Cycloheptatriene, 2,3,4,5,7,7-hexamethyl-	74779-68-3	1279		162.24±24.98	154.95±13.02	51.09±3.09	91.04±7.03	1194.07±52.99	1429.48±68.84	228.34±29.67	24.66±2.2	65.8±6.8	143.18±10.02	81.15±8.29	104.73±13.29
212	Undecane, 5,7-dimethyl-	17312-83-3	1190		174.02±27.55	105.03±7.24	183.32±15.26	86.13±7.86	210.66±15.16	174.12±9.49	276.28±33.01	163.3±27.67	276.45±11.71	228.2±20.29	291.59±43.31	143.01±24.66
213	Undecane	1120-21-4	1100		169.73±29.89	132.97±2.59	160.59±18.37	131.34±7.27	157.08±21.73	110.91±3.5	146.65±16.61	117.09±15.39	148.56±24.34	136.32±9.23	129.88±4.43	100.55±9.65
214	Nonane, 3-methyl-5-propyl-	31081-18-2	1185		160.69±25.08	90.08±6.15	169.62±14.36	76.43±7.75	174.28±10.94	154.56±7.51	248.8±29.94	142.26±22.98	244.42±11.25	200.35±18.05	251.32±33.16	129.37±22.73
215	Adamantane	281-23-2	1116		132.71±26.27	14.81±3.88	208.27±19.16	8.55±0.98	202.45±23.36	19.36±2	382.12±37.59	30.62±3.17	568.1±47.65	23.19±2.19	644.48±21.9	49.89±11.42
216	Nonane	111-84-2	900		161.37±14.4	54.86±15.9	126.62±2.36	80.23±2.26	64.7±39.77	281.16±48.54	336.38±65.81	424.67±79.63	295.76±58.23	331.2±67.9	200.74±13.26	298.25±16.41
217	1,3-Cyclopentadiene, 1,2,3,4,5-pentamethyl-	4045-44-7	983		136.57±8.84	198.81±80.29	125.16±9.29	242.15±30.36	202.32±27.46	218.84±24.38	234.98±15.83	200.96±10.82	215.74±4.97	315.21±6.27	216.51±4.45	234.1±48.83
218	Cyclohexane, 1-ethyl-2-propyl-	62238-33-9	1140		123.33±26.4	52.24±19.42	191.69±16.02	111±12.14	240.87±19.36	204.27±3.53	141.66±7.55	53.87±5.37	243.34±35.88	140.32±7.98	242.62±22.12	174.01±3.1
219	Undecane, 2-methyl-	7045-71-8	1164		122.44±14.52	82.45±11.07	117.78±11.32	73.68±6.01	115.84±12.11	73.07±5.07	120.13±16.51	78.1±12.62	124.44±5.6	96.41±8.36	126±12.97	63.77±13.21
220	1,5-Cyclooctadiene, 1,6-dimethyl-	3760-13-2	1103		108.12±22.77	83.49±19.73	98.98±8.46	108.87±13.93	63.98±6.77	95.21±0.68	109.53±5.69	102.45±3.54	105.85±26.1	125.2±24.11	81.2±6.38	88.6±8.34
221	Dodecane, 2,6,11-trimethyl-	31295-56-4	1275		106.17±14.19	72.21±6	87.1±6.15	69.06±6.3	211.51±18.5	189.01±8.37	112.89±18.31	82.49±20.88	88.65±3.51	75.5±6.02	92.27±6.45	62.59±7.68
222	2,6-Octadiene, 2,6-dimethyl-	2792-39-4	978		106.7±7.74	52.53±9.6	175.27±3.24	90.36±9.61	167.53±1.92	119.07±5.82	109.37±6.17	58.71±6.24	144.16±11.53	153.75±4.47	145.38±5.47	134.23±7.83
223	Dodecane, 3-methyl-	17312-57-1	1271		97.07±13.53	64.22±6.92	81.08±10.05	62.88±6.02	203.14±15.07	179.81±18.64	110.13±15.15	82.36±20.91	82.94±1.98	75.49±6.02	82.84±1.21	58.1±5.78
224	Undecane, 4,7-dimethyl-	17301-32-5	1185		100.94±14.58	61.11±5.22	107.61±11.53	48.02±4.51	128.35±8.95	103.99±7.31	167.85±20.88	99.48±17.16	168.11±9.49	135.65±11.21	169.78±22.96	83.56±15.72
225	Tridecane, 4,8-dimethyl-	55030-62-1	1384		90.99±14.72	55.93±10.23	104.21±14.09	56.59±5.82	163.38±2.2	128.2±1.63	168.36±12.94	149.59±31.33	157.86±22.82	138.43±7.9	157.26±18.7	95.93±9.15
226	5-Hexenal, 4-methylene-	17844-21-2	897		81.82±4.7	67.77±3.25	147.37±3.5	51.53±6.75	235.2±13.46	82.03±6.35	165.39±15.57	143.34±13.21	256.4±19.68	76.06±2.81	247.79±21.66	105.76±4.56
227	Undecane, 4,6-dimethyl-	17312-82-2	1196		83.05±12.62	47.25±3.27	85.11±6.71	37.26±3.67	93.86±6.49	82.51±5.54	129.19±13.74	75.94±12.55	120.75±5.62	105.51±9.5	125.33±15.99	65.55±10.66
228	Decane, 4-methyl-	2847-72-5	1060		80.28±5.11	55.47±3.83	75.97±3.86	55.3±4.47	49.17±20.24	32.65±2.71	44.73±11.92	22.71±2.99	38.56±2.23	32.71±0.83	45.72±20.2	26.52±2.06
229	1,7-Nonadiene, 4,8-dimethyl-	62108-28-5	1026		75.63±4.74	68.17±3.16	73.93±2.85	59.65±3.79	57.1±7.28	57.95±3.29	53.04±5.75	55.81±2.1	60.74±2.07	60.38±1.77	56.31±2.17	55.67±1.22
230	1,7-Octadiene, 2,7-dimethyl-3,6-bis(methylene)-	16714-60-6	1083		62.73±4.78	97.63±1.22	65.91±2.19	93.17±5.56	48.84±1.74	66.83±0.13	75.84±3.38	67.59±2.93	37.79±3.2	112.09±4.17	48.03±2.03	62.6±8.07
231	Tridecane	629-50-5	1300		53.15±9.2	28.6±4.81	46.92±5.86	41.58±6.44	37.96±4.56	37.97±1.88	54.16±2.75	53.98±14.05	46.03±4.13	39.2±2.33	41.18±5.7	34.53±2.91
232	cis-2,6-Dimethyl-2,6-octadiene	2492-22-0	985		61.6±4.73	21.08±0.3	41.8±8.7	37.39±3.13	21.03±0.52	58.06±8.42	47.45±9.71	35.12±3.81	56.22±3.19	52.76±8.78	30.57±1.31	38.24±10.62
233	Decane, 2,3,6-trimethyl-	62238-12-4	1121		55.23±4.35	40.99±4.63	52.86±5.45	39.38±2.78	45.36±10.22	24.34±2.18	35.91±6.36	28±4.73	37.22±4.26	25.49±2.51	35.39±2.93	20.58±4.58
234	3,5-Dimethyldodecane	107770-99-0	1285		47.34±6.95	33.71±3.2	39.4±4.24	33.49±3.66	108.23±6.88	113.4±5.54	51.48±5.79	41.12±10.22	41.88±1.86	39.94±2.71	42.33±1.89	31.08±3.2
235	Tetradecane, 4-methyl-	25117-24-2	1459		40.78±13.36	22.89±6.61	12.34±0.96	22.87±2.45	96.96±5.47	248.74±13.94	49.5±4.44	9.1±0.66	15.04±3.1	18.63±1.35	13.61±2.44	26.78±0.84
236	Nonane, 2,5-dimethyl-	17302-27-1	1021		45.66±4.76	25.82±2.63	44.33±2.08	22.43±2.11	28.84±2.81	33.79±3.69	34.98±8.04	20.76±1.51	37.74±0.29	38.04±3.52	27.48±3.91	25.31±5.05
237	Nonane, 5-methyl-5-propyl-	17312-75-3	1229		38.6±3.74	22.31±1.91	99.04±5.13	26.79±2.99	89.5±7.74	40.38±7.5	36.53±2.23	20.52±0.18	149.66±10.87	49.06±5.3	189.14±15.15	35.27±6.96
238	Spiropentane, propyl-	6191-88-4	774		38.05±3.89	75.45±13.92	29.23±0.77	26.9±0.44	25.48±1.57	48.36±3	24.49±1.93	18±5.37	18.75±0.73	40.94±5.19	15.7±0.98	29.15±1.25
239	Cyclohexene, 2-ethenyl-1,3,3-trimethyl-	5293-90-3	1105		30.18±7.97	25.05±5.54	30.76±1.01	31.14±3.16	23.02±1.94	25.97±0.24	34.47±1.8	34.37±2.46	32.99±8.07	33.4±7.65	30.49±2.17	25.97±3.96
240	Undecane, 6,6-dimethyl-	17312-76-4	1229		36.94±2.92	21.4±2.42	79.63±7.97	26.59±1.04	83.13±8.51	35.33±7.27	31.18±0.68	20.25±0.34	111.62±7.04	39.11±5.12	144.35±13.99	29.7±5.24
241	1-Undecene, 9-methyl-	74630-41-4	1152		34.76±3.09	30.35±3.53	41.06±1.52	23.1±3.95	75.22±4.85	24.4±2.52	36.26±6.7	29.21±5.71	40.99±2.17	27.2±2.76	41.19±4.17	22.24±6.14
242	Tetradecane, 2,6,10-trimethyl-	14905-56-7	1539		23.62±7.03	7.68±2.56	18.57±5.54	10±0.83	43.2±2.82	25.42±2.2	39.75±3.69	36.79±8.61	40.5±11.7	23.12±2.25	27.17±6.01	20.66±4.11
243	Cyclohexane, (1,1-dimethylpropyl)-	31797-64-5	1130		30.69±6.36	10.58±1.48	32.88±5.05	9.4±1.65	23.13±2.23	13.97±2.12	54.3±14.47	13.82±1.21	64.02±17.51	29.41±17.63	57.54±13.84	23.05±10.51
244	Dodecane, 5-methyl-	17453-93-9	1255		28.05±3.37	15.21±1.25	27.68±3.94	19.67±2.8	18.07±10.13	9.47±0.53	16.71±4.64	8.64±1.33	12.91±2.25	10.07±0.48	22.54±9.11	9.95±0.33
245	Undecane, 3,4-dimethyl-	17312-78-6	1247		27.05±2.75	14.64±1.34	26.06±3.73	18.78±2.82	17.88±10.23	9.18±0.41	16.05±4.39	7.83±1.15	12.62±2.19	9.76±0.41	16.77±6.23	9.14±0.54
246	Tetradecane	629-59-4	1400	Fruity	28.68±6.63	11.43±2.37	26.01±4.19	13.31±1.73	39.6±1.09	31.58±1.09	42.37±4.41	33.43±6.89	41.53±7.96	34.86±1.5	37.71±4.42	26.35±2.45
247	1,5-Cyclooctadiene, 3-(1-methyl-2-propenyl)-	16538-88-8	1209		30.7±6.21	11.94±3.12	32.87±0.82	12.82±1.13	59.21±3.2	47.54±0.5	27.26±0.48	17.86±2.83	63.91±7.3	21.07±0.11	71.93±7.21	18.47±0.79
248	Tetradecane, 2-methyl-	1560-95-8	1463		27.62±6.29	11.26±2.36	6.22±1.09	16.43±1.36	42.08±2.49	102.58±5.49	29.19±1.57	6.16±1.29	8.96±2.29	12.21±2.84	6.29±0.75	16.18±3.41
249	1,3,5-Cycloheptatriene	544-25-2	772		28.51±3.55	51.45±15.99	47.11±6.75	31.42±7.55	58.32±28.03	138.6±26.01	135.97±29.09	150.73±26.17	163.27±9.41	175.63±26.8	135.91±25.69	164.61±4.91
250	2,6,10-Trimethyltridecane	3891-99-4	1449		26.02±5.63	14.51±3.66	8.49±1.34	14.47±1.46	45.42±2.09	101.24±5.25	25.59±2.32	8.72±3.56	11.53±3.36	12.73±0.84	9.74±1.82	15.92±1.35
251	2,6-Dimethyldecane	13150-81-7	1112		24.78±7.62	15.75±4.96	22.85±3.78	18.03±4.24	21.08±2.65	18.96±1.07	31.23±4.84	18.55±1.32	33.93±8.07	26.63±9.45	29.77±1.73	19.97±2.48
252	Hexadecane, 4-methyl-	25117-26-4	1659		18.27±4.03	5.82±2.32	23.86±6.78	16.88±0.72	85.54±6.28	46.21±5.52	21.32±5.16	12.26±1.51	41.69±12.39	17.84±3.86	40.45±11.27	39.7±5.95
253	1-Dodecene	112-41-4	1190		22.81±4.33	12.53±0.63	26.02±0.96	9.85±0.66	27.01±1.26	27.38±2.05	37.54±6.1	18.98±2.46	41.07±2.58	32.66±2.27	39.1±4.64	21.15±3.89
254	Pentadecane, 2,6,10-trimethyl-	3892-00-0	1633		14.18±3.59	4.79±1.79	14.86±3.28	15.13±2.24	54.61±3.53	30.15±2.89	17.58±2.98	9.81±2.15	34.97±9.31	11.93±3.06	30.74±6.21	26.7±0.38
255	Dodecane, 5,8-diethyl-	24251-86-3	1572		14.98±3.89	4.13±1.49	12.24±4.95	6.24±1.1	26.29±1.7	19.72±2.04	25.98±6.29	23.91±4.76	25.45±9.51	16.53±1.72	19.92±5.88	16.33±4.11
256	Undecane, 4-methyl-	2980-69-0	1160		17.94±2.94	9.24±1.07	17.86±1.48	8.9±1.04	15.86±1	15.25±1.18	22.47±2.79	12.86±1.71	26.36±2.14	19.08±2.36	20.02±3.09	13.57±3.07
257	1,10-Undecadiene	13688-67-0	1095		15.09±2.78	20.34±1.87	27.96±2.46	12.92±0.92	21.51±2.34	10.17±1.45	12.79±2.45	17.79±1.53	43.16±6.67	16.18±1.75	48.75±4.59	19.53±2.34
258	Undecane, 5-methyl-	1632-70-8	1156		17.21±3.11	11.05±0.91	15.26±1.8	12.5±1.04	17±1.62	14.18±0.88	20.21±0.49	14.59±3.15	20.32±1.45	13.89±0.79	19.76±2.76	10.02±1.43
259	Hexadecane, 2-methyl-	1560-92-5	1664		12.51±3	5.12±2.21	15.71±4.11	12.32±1.01	55.6±2.34	33.47±4.69	18.83±2.85	11.7±1.61	30.35±8.3	14.56±2.97	27.88±8.07	26.19±3.37
260	Octane	111-65-9	800		15.45±0.92	9.79±1.52	41.38±1.81	20.69±0.48	215.31±12.84	27.31±3.19	16.78±2.65	9.17±1.82	52.96±5.61	14.82±2.05	52.13±1.39	35.54±2.79
261	2,4-Decadienal	2363-88-4	1317	orange sweet fresh citrus fatty green	11.43±3.09	8.35±2.56	11.33±0.66	11.02±1.81	16.38±0.55	22.45±1.18	15.5±1.98	9.15±0.89	13.8±4.06	14.82±0.98	12.61±3.3	8.73±1.08
262	Heptane, 3,3,4-trimethyl-	20278-87-9	937		15.27±3.11	11.02±1.32	21.02±1.21	6.49±0.29	18.09±1.11	12.54±1.28	11.95±0.72	11.46±1.92	24.14±0.83	15.15±1.91	20.5±0.44	17.47±2
263	Dodecane	112-40-3	1200		13.84±2.22	6.42±0.91	13.58±1.3	10.19±0.99	7.62±0.24	10.59±1.55	12.93±1.45	10.16±1.58	15.01±1.28	11.17±0.78	10.49±1.15	9.91±1.32
264	Nonane, 2,6-dimethyl-	17302-28-2	1018		11.67±1.38	4.29±0.77	9.73±0.27	6.25±0.13	3.14±0.8	8.49±0.81	9.06±1.8	6.09±0.18	6.95±0.36	8.99±0.83	3.34±0.31	5.94±1.65
265	1-Undecyne	2243-98-3	1095		9.38±1.15	7.22±0.56	28.79±2.67	6.52±0.86	15.41±0.1	5.52±0.99	9.81±0.94	11.91±0.55	47.92±3.97	13.14±1.59	52.3±2.88	15.05±1.95
266	Undecane, 2,9-dimethyl-	17301-26-7	1233		10±2.31	3.18±1.38	12.28±2.51	6.01±0.68	10.76±1.12	8.29±0.31	12.72±2.23	7.56±0.64	19±2.7	10.16±0.49	16.66±0.6	9.38±0.7
267	Undecane, 3,5-dimethyl-	17312-81-1	1207		9.37±1.08	8.35±1.06	10.7±0.88	8.28±0.62	12.75±2.15	7.55±0.16	12.76±1.6	10.19±2.32	11.32±0.99	8.64±0.71	12.31±2.19	10.19±2.2
268	exo-7-(trans-1-Propenyl)bicyclo[4.2.0]oct-1(2)-ene	107983-42-6	1140		8.74±0.64	6.02±0.94	17.94±1.52	11.07±0.97	24.21±8.1	32.63±2.67	38.3±9.58	45.94±8.27	42.54±3.25	35.39±4.77	47.59±5.61	31.08±3.11
269	Undecane, 3,6-dimethyl-	17301-28-9	1210		8.02±1.01	7.87±0.95	8.91±0.62	7.74±0.92	12.16±1.53	6.75±0.49	10.69±1.4	9.3±2.38	10.04±0.77	7.07±0.68	12.15±1.7	6.56±0.6
270	Dodecane, 4-methyl-	6117-97-1	1259		8.54±0.95	6.5±0.28	8.97±0.57	6.56±0.47	10.08±1.19	5.98±0.1	6.22±0.56	6.82±1.88	7.94±0.62	5.86±0.61	7.98±0.09	5.98±0.36
271	12-Oxatetracyclo[4.3.1.1(2,5).1(4,10)]dodecane, 11-isopropylidene-	105191-67-1	1272		7.18±1	6.69±0.11	2.7±0.8	3.92±0.06	42.48±1.99	43.73±2.98	8.76±1.29	1.58±0.18	2.29±0.22	5.48±0.38	3.57±0.29	2.97±0.34
272	Undecane, 2,4-dimethyl-	17312-80-0	1208		6.62±0.62	5.44±0.98	5.49±1.29	5.01±0.4	3.28±0.76	4.22±0.5	7.46±1.37	7.75±1.66	5.04±0.57	5.14±1.85	2.65±2.44	3.06±0.86
273	Heptane, 2,4-dimethyl-	2213-23-2	821		4.89±0.63	5.56±0.29	8.83±0.28	2.38±0.3	2.53±0.37	4.31±0.53	5.11±0.48	6.06±1.09	10.15±0.73	6.47±0.33	9.6±0.48	4.9±0.06
274	Isolongifolene, 4,5,9,10-dehydro-	156747-45-4	1380		4.58±0.83	8.31±1.65	5.02±0.27	7.92±0.46	45.95±1.42	17.59±0.19	6.71±0.54	5.87±0.65	10.36±0.23	6.53±0.2	11.04±1.53	7.46±0.83
275	Undecane, 4,8-dimethyl-	17301-33-6	1185		5.35±1.08	2.44±0.27	6.75±0.23	2.5±0.4	6.33±0.72	5.14±0.62	7.39±0.64	5.27±1.96	8.76±0.51	6.52±0.77	10.21±1.02	4.75±1.05
276	Bicyclo[3.1.0]hex-2-ene, 4,4,6,6-tetramethyl-	19487-09-3	873		3.92±0.44	4.71±0.25	4.52±0.07	2.81±0.48	0±0	3.97±0.19	3.1±0.45	3.5±0.83	0±0	3.87±0.44	0±0	2.24±0.46
277	Cyclooctane, 1,5-dimethyl-2,6-bis(methylene)-	74301-13-6	1215		0.95±0.31	1.13±0.26	1.2±0.42	2.08±0.62	1.47±0.43	2.1±0.69	2.06±0.5	1.07±0.08	2.57±0.95	2.31±0.22	2.62±0.39	1.17±0.27
278	Heptane, 1,1-dimethoxy-	10032-05-0	1072	green privet fruity tropical orange	1.15±0.14	1.72±0.17	2.12±0.36	1.77±0.24	2.34±0.31	2.8±0.07	3.42±0.28	3.59±0.48	2.5±0.54	2.3±0.01	2.84±0.07	2.29±0.36
279	Hexane, 2,3-dimethyl-	584-94-1	760		0.98±0.84	1.01±0.73	5.18±0.33	0.63±0.46	6.65±0.12	1.64±0.74	1.31±0.15	0.72±0.66	4.39±1.11	2.16±0.38	5.48±0.56	1.95±0.2
	Terpenoids
280	Sabinen	3387-41-5	972	woody terpene citrus pine spice	16272.15±1701.14	12196.17±101.38	21577.9±934.64	7245.79±253.44	14782.67±519.72	5036.8±405.99	29505.85±1805.75	19779.07±2057.03	33444.44±1762.31	13795.51±921.53	35896.89±1927.47	13269.23±1471.89
281	Alpha-Fenchene	471-84-1	950	camphor	4282.8±458.35	3170.88±161.51	6476.08±564.46	2568.49±187.59	6024.84±359.96	1790.12±114.01	5973.31±256.49	3479.47±360.67	5591.94±498.4	2719.65±240.66	6063.52±552.97	3119.93±348
282	(-)-beta-Pinene	18172-67-3	943	dry woody fresh pine hay green resinous	2320.17±193.55	2628.93±197.29	3629.88±326	2180.58±87	3234.6±190.72	1471.52±144.26	3011.7±128.78	2470.65±214.78	3091.36±248.05	2402.34±204.57	3267.42±334.39	2497±264.57
283	(E)-4,8-Dimethylnona-1,3,7-triene	19945-61-0	1116		2083.8±483.62	245.44±71.15	3767.45±421.81	169.26±18.95	3778.07±398.62	336.04±39.7	7345.44±729.62	476.49±27.08	10983.08±905.28	382.68±30.66	12485.7±397.41	897.84±216.74
284	Thujone	546-80-5	1103	cedarleaf thujonic	1513.3±398.1	1281.41±320.52	1405.95±112.33	1604.74±213.15	1146.75±135.97	1230.42±64.57	1623.08±141.34	1540.89±74.01	1603.32±489.03	1604.45±511.97	1339.85±129.23	1268.19±230.48
285	3-Terpinolenone	491-09-8	1340	sharp minty phenolic	889.9±415.56	504.79±205.18	776.09±101.04	857.04±95.04	465.23±56.71	435.77±26.74	1182.52±148.72	1206.98±357.4	989.2±425.74	810.49±394.29	964.77±381.33	561±160.98
286	.delta.-EIemene	20307-84-0	1338	sweet herbal woody	777.46±364.38	442.76±182.66	623.22±91.58	729.98±89.44	379.21±48.13	368.3±25.68	1026.21±113.56	1060.85±311	763.7±339.96	691.02±336.53	747.43±317.1	457.31±140.95
287	.gamma.-Terpinene	99-85-4	1060	oily woody terpene lemon/lime tropical herbal	1024.55±140.69	270.89±13.18	1882.45±71.43	280.19±9.72	1498.16±195.66	260.43±38.89	1789.01±118.8	328.63±2.58	2854.39±204.62	369.96±9.3	3071.62±142.31	729.58±97.54
288	.beta.-Pinene	127-91-3	981	dry woody resinous pine hay green	867.07±94.08	1609.56±420.17	896.85±64.09	1621.37±200.6	1668.45±174.5	1501.73±37.58	1521.44±22.35	1235.16±89.45	1449.03±44.28	2254.12±32.86	1399.3±68.92	1873.89±94.63
289	Cyclohexanol, 1-methyl-4-(1-methylethyl)-, cis-	3901-95-9	1138		720.92±87.23	522.47±60.84	725.06±74.56	425.45±30.04	827.04±86.68	485.26±36.02	840.39±150.08	572.6±95.19	797.29±59.39	563.39±56.49	827.21±96.06	386.98±75.22
290	1,6-Octadiene, 3,7-dimethyl-	2436-90-0	946	citronellol herbal citrus terpenic	597.71±49.1	621.45±54.22	993.7±63.22	426.56±16.4	715.46±33.47	454.26±35.66	660.66±25.63	578.6±53.32	969.51±61.4	685.43±58.41	994.36±44.23	666.1±56.07
291	p-Mentha-1,5,8-triene	21195-59-5	1111	roasted	361±56.74	92.56±18.74	476.35±25.26	92.02±7.41	583.33±54.57	129.1±8.74	712.06±62.05	116.91±3.77	961.68±43.71	122.65±7.77	1090.99±38.74	204.27±33.22
292	Terpinen-4-ol	562-74-3	1177	pepper woody earth musty sweet	387.82±52.92	301.1±22.53	405.38±36.48	209.04±18.28	561.94±39.11	356.48±21.28	628.49±84.79	371.98±64.11	611.97±19.57	498.03±42.25	682.05±88.91	301.49±50.89
293	Perillene	539-52-6	1101	woody	282.13±51.18	196.14±41.97	293.91±11.18	223.42±25.56	183.46±21.1	210.95±2.01	314.25±7.79	242.83±5.76	318±50.34	257.87±47.12	272.67±13.87	211.14±16.42
294	(-)-trans-Pinane	33626-25-4	972		296.13±6.12	306.02±7.25	331.7±8.02	215.93±24.04	250.4±5.74	289.54±24.76	290.82±52.48	241.11±19.51	354.24±7.83	337.37±31.15	332.95±20.39	337.78±17.96
295	Iridomyrmecin	485-43-8	1463		287.92±67.77	183.13±52.89	77.7±10.8	195.1±16.38	944.6±47.48	2603.36±142.26	406.1±33.12	27.28±2.8	101.08±19.4	141.52±15.44	87.33±17.53	217.8±13.05
296	.beta.-Guaiene	88-84-6	1490	sweet woody dry guaiacwood spicy powdery	107.9±107.48	64.97±46.55	61.1±8.17	92.78±26.57	59.34±3	106.43±45.72	220.59±47.31	129.78±62.38	93.11±44.5	61.95±36.15	138.74±117.95	113.53±88.21
297	Bicyclosesquiphellandrene	54324-03-7	1489		108.03±107.26	64.9±46.53	60.9±8.25	92.58±26.41	59.28±3.06	106.41±45.69	220.41±47.43	129.6±62.33	92.97±44.63	61.77±36.02	138.7±117.9	113.45±88.14
298	(+)-epi-Bicyclosesquiphellandrene	54274-73-6	1482		103.96±104.66	58.98±43.22	55.8±8.22	84.97±25.47	55±3.01	100.29±44.76	212.76±46.81	121.53±60.28	86.67±42.87	59.1±36.82	134.12±117.44	107.52±86.97
299	1-Isopropyl-4,7-dimethyl-1,2,3,4,5,6-hexahydronaphthalene	16729-00-3	1481		101.31±103.67	56.37±39.59	52.61±8.18	79.3±22.43	54.94±3.09	100.29±44.76	207.98±47.03	115.21±57.92	82.58±41.06	57.82±35.03	131.12±117.06	104.77±84.15
300	(2R,8R,8aS)-8,8a-Dimethyl-2-(prop-1-en-2-yl)-1,2,3,7,8,8a-hexahydronaphthalene	5090-61-9	1456		246.17±46.59	168.21±38.69	65.37±5.66	156.55±14.69	558.81±34.52	1242.1±63.56	281.09±18.72	26.45±2.58	80.27±10	119.82±12.53	71.26±12.3	159.04±10.69
301	p-Menth-8-en-1-ol	138-87-4	1153	pungent earthy woody	230.76±18.47	174.05±4.79	217.05±21.03	183.65±15.25	286.21±28.2	233.41±11.5	273.44±12.14	189.19±34.65	210.63±8.76	206.76±16.55	250.97±15.97	157.86±18.57
302	Bicyclo[3.1.1]heptane, 6-methyl-2-methylene-6-(4-methyl-3-pentenyl)-, [1R-(1.alpha.,5.alpha.,6.beta.)]-	55123-21-2	1446		241.79±47.02	167.58±39.87	64.8±5.55	154.83±14.72	556.13±33.58	1231.36±64.16	279.91±18.77	25.19±2.13	79.41±10.64	117.85±13.64	71.33±13.23	156.73±11.88
303	(S,1Z,6Z)-8-Isopropyl-1-methyl-5-methylenecyclodeca-1,6-diene	317819-80-0	1448		204.54±40.27	132.43±32.16	51.11±6.91	122.58±10.89	443.05±30.61	977.43±52.01	226.12±20.02	20.34±2.09	63.55±8.19	95.39±12.31	56.14±7.86	124.84±12.69
304	Fenchol	1632-73-1	1113	camphor borneol pine woody dry sweet lemon	173.08±40.51	18±5.49	293.46±28.73	17.24±2.26	312.99±30.6	28.53±3.67	571.43±58.57	40.59±3.82	863.89±63.66	32.35±3.27	977.8±25.07	75.53±17.85
305	(1S,4S,4aR)-1-Isopropyl-4-methyl-7-methylene-1,2,3,4,4a,5,6,7-octahydronaphthalene	157477-72-0	1463		203.9±39.23	135.66±30.6	52.64±7.26	125.52±10.39	447.95±30.13	986.35±49.85	228.81±15.69	20.82±1.98	64.62±8.25	96.74±11.32	56.97±8.18	127.21±11.47
306	(1S,4S,4aS)-1-Isopropyl-4,7-dimethyl-1,2,3,4,4a,5-hexahydronaphthalene	267665-20-3	1458		203.78±39.1	135.53±30.64	52.81±7.39	125.52±10.32	447.76±30.03	987.67±49.67	228.03±15.13	20.69±2.06	64.64±8.28	96.4±11.34	57.21±8.39	127.14±11.54
307	7-Octen-2-ol, 2,6-dimethyl-	18479-58-8	1064	fresh citrus lime floral clean cologne weedy	170.62±18.64	187.76±31.97	223.67±17.68	194.95±27.33	592.22±24.88	549.32±19.69	253.7±20.63	138.66±14.6	276.04±20.11	169.95±23.93	337.88±29.63	174.84±17.2
308	Cyclohexene, 1-methyl-4-(1-methylethenyl)-, (S)-	5989-54-8	1029	terpene pine herbal peppery	166.99±18.51	160.17±25.15	165.59±6.75	176.29±13.8	166.57±2.26	180.03±2.44	131.71±1.47	171.53±3.2	161.79±17.12	158.93±16.99	164.01±3.91	172.41±20.15
309	Limonene	138-86-3	1026	citrus herbal terpene camphor	151.21±19.22	141.75±24.85	149.05±6.31	157.14±13.02	157.24±2.41	162.77±6.12	117.09±2.09	156.96±2.19	146.21±13.67	141.76±17.91	148.11±1.5	159.61±28.19
310	trans-Rose oxide	876-18-6	1121	Rose flavor	116.35±26.06	18.72±5.28	202.25±22.55	20.05±0.75	220.68±23.29	24.74±1.72	404.31±49.32	33.65±1.39	608.98±45.81	24.5±2.41	685.18±21.74	58.52±11.76
311	Rose oxide	16409-43-1	1111	green red rose spicy fresh geranium	113.2±23.75	22.66±3.94	201.82±17.89	18.02±3.54	220.44±23.08	25.31±1.09	375.91±31.89	33.46±4.15	596.71±42.92	22.42±2.32	677.54±22.28	57.91±9.5
312	1,3-Cyclohexadiene, 1,5,5,6-tetramethyl-	514-94-3	976		125.16±12.04	234.73±51.08	134.65±8.03	234.98±29.16	247.95±19.99	229.74±7.03	229.46±4.56	177±10	202.66±2.74	316.34±7.5	198.15±2.54	264.48±18.06
313	(-)-cis-rose oxide	3033-23-6	1110	rose cortex green floral geranium powdery metallic	107.44±20.5	0±0	200.64±18.95	0±0	218.72±22.47	0±0	379.88±29.11	0±0	596.03±42.36	0±0	673.93±17.99	48.92±11.45
314	6,7-Dimethyl-1,2,3,5,8,8a-hexahydronaphthalene	107914-92-1	1273		120.64±17.52	120.57±5.48	34.24±1.7	60.5±5.02	933.98±47.59	972.97±45.11	172.91±25.56	18.07±1.62	40.46±3.24	99.44±7.2	53.85±4.97	59.53±8.14
315	Valerena-4,7(11)-diene	351222-66-7	1460		113.11±22.5	75.96±18.76	31.26±4.64	72.73±5.15	281.61±16.97	667.89±34.33	133.91±9.43	12.12±1.03	39.23±4.85	54.75±6.83	33.86±5.53	75.92±5.78
316	(-)-Aristolene	6831-16-9	1447		110.38±22.99	72.32±17.6	29.96±4.15	70.74±5.33	279.8±17.24	662.38±34.41	133.37±9.51	11.62±0.61	38.71±5.65	53.86±5.36	31.82±5.13	75.35±6.1
317	Bicyclo[2.2.1]heptane, 2-chloro-1,7,7-trimethyl-, (1R-endo)-	30462-53-4	1116		93.73±18.2	11.68±2.43	151.42±13	11.1±1.6	160.19±14.67	22.95±1.84	289.53±33.76	24.91±4.98	423.47±27.99	17.33±2.83	477.51±14.66	40.08±8.21
318	Naphthalene, decahydro-1,6-bis(methylene)-4-(1-methylethyl)-, (4.alpha.,4a.alpha.,8a.alpha.)-	30021-46-6	1459		107.79±24.24	69.75±19.48	29.94±4.96	75.01±5.96	337.19±17.79	912.86±43.79	148.7±10.77	11.14±1.58	39.16±7.09	53.77±6.44	33.26±4.91	79.57±6.91
319	Linalool	78-70-6	1099	citrus floral sweet bois de rose woody green blueberry	104.21±18.71	74.65±4.54	110.18±10.17	98.06±7.17	130.71±12.71	60.78±3.42	124.04±18.05	55.88±3.42	124.73±10.78	94.7±7.38	124.88±8.14	64.81±1.61
320	cis-beta-Ocimene	3338-55-4	1038	warm floral herb flower sweet	90.71±10.85	100.6±10.74	125.54±14.98	101.25±4.32	186.01±14.02	86.79±4.88	142.6±5.58	84.55±0.41	105.48±8.71	86.97±5.15	109.02±4.87	90.77±7.88
321	Geranyl acetate	105-87-3	1382	floral rose lavender green waxy	100.18±15.58	64.34±18.91	107.37±13.23	146.93±4.43	181.51±2.1	187.23±3.85	99.36±8.02	73.52±5.23	108.51±21.46	160.67±7.2	99.99±16.42	135.99±11.38
322	beta-Damascenone	23726-93-4	1386	apple rose honey tobacco sweet	94.61±15.35	57.12±17.6	103.81±14.8	135.51±5.11	189.29±8.15	169.63±3.65	93.95±11.84	60.35±2.87	105.56±25.6	151.28±6.34	101.15±22.33	133.8±11.01
323	beta-Elemen	515-13-9	1391	sweet	91.63±15.17	45.62±16.18	94.65±15.62	140.96±5.29	196.92±8.04	176.97±3.86	74.85±9.8	31.74±3.48	94.12±24.06	139.77±9.18	86.08±22.73	132.02±16.31
324	S-ipsdienol	35628-00-3	1147	pine balsamic	98.56±10.74	74.97±7.59	101.21±11.27	63.89±4.81	115.83±12.45	68.45±6.08	104.13±17.73	75.64±14.23	101.1±6.33	71.86±9.06	108.54±12.54	49.58±11.46
325	trans-Piperitol	16721-39-4	1208	herbal	91.68±17.44	54.03±26.06	124.31±15.88	65.36±7.73	83.53±7.97	97.88±5.47	94.51±12.23	60.36±5.35	177.11±42.67	96.03±7.17	170.04±29.72	114.49±5.53
326	Citral	5392-40-5	1273	sharp lemon sweet	90.12±13.83	78.4±4.19	40.83±2.33	51.09±3.98	514.84±27.5	527.62±24.32	129.36±18.96	32.58±6.06	45.24±5.68	76.5±6.6	46.95±3.22	50.44±6.22
327	Eucalyptol	470-82-6	1030	eucalyptus herbal camphor medicinal	81.04±9.47	81.62±11.99	83.23±2.61	82.15±6.64	81.14±0.4	85.15±2.51	66.12±1.1	94.31±1.07	80.63±7.16	77.17±8.73	81.24±1.13	83.15±9.47
328	Artemisia ketone	546-49-6	1062	herbal honey mint berry	84.2±8.43	68.48±5.69	75.32±4.3	72.53±4.66	54.22±12.74	53.23±4.68	60.34±7.22	42.9±6.31	43.9±4.13	43.47±3.44	48.16±10.93	39.15±2.53
329	Isopinocarveol	6712-79-4	1178	woody warm balsam	68.13±9.85	71.2±8.11	71.87±4.21	47.52±3.15	111.73±5.47	61.81±3.46	106.88±12.92	61.57±9.67	109.7±6.37	86.3±5.21	119.58±14.6	59.73±8.11
330	cis-(+)-Limonene oxide	13837-75-7	1134	fresh citrus	56.26±6.36	26.27±4.34	77.49±6.36	29.46±2.32	44.92±5.09	29.99±3.35	89.65±1.8	46.76±2.39	124.52±16.92	46.28±2.49	110.58±10.11	44.85±4.27
331	Limonene oxide	1195-92-2	1133	fresh clean citrus minty spearmint herbal	54.59±6.07	25.88±4.17	76.69±6	28.49±2.11	43.49±5.34	28.01±3.15	88.37±3.73	46.45±2.45	113.25±10.81	50.97±6.62	110.22±10.21	45.56±5.41
332	2,6-Dimethyl-1,3,5,7-octatetraene, E,E-	460-01-5	1131		51.36±10.25	33.45±12.39	75.23±7.47	38.46±6.56	155.24±86.1	211.78±30.41	257.51±20.24	258.05±25.5	258.87±19.28	203.6±7.37	253.91±22.79	206.32±8.98
333	1-Methyl-4-(6-methylhept-5-en-2-yl)cyclohexa-1,3-diene	451-55-8	1482		23.79±21.53	15.79±11.2	15.22±2.83	23.32±5.12	18.1±0.36	42±26.99	48.62±10.52	30.54±13.14	24.62±9.88	15.1±7.86	34.06±25.41	26.99±19.02
334	3-Thujanone	1125-12-8	1119	cedarleaf	48.42±3.34	33.61±6.18	45.71±2.71	25.78±2.52	63.83±9.23	69.5±15.07	58.9±3.86	36.88±2.42	67.13±10.8	49.62±2.01	57.02±7.77	70.9±6.23
335	(R)-Lavandulol	498-16-8	1170	herbal	49.12±8.23	34.83±2.78	43.95±4.69	17.88±1.69	78.37±5.01	33.5±2.68	81.76±18.94	36.72±3.93	80.88±7.79	70.83±6.81	91.5±13.49	36.72±7.5
336	Isoterpinene	586-62-9	1088	fresh woody sweet pine citrus	44.54±8.27	26.44±6.89	54.13±4.84	24.99±6.07	45.87±7.07	18.6±5.25	83.05±4.13	36.76±1.86	86.6±7.51	30.11±0.24	98.08±5.04	27.94±5.86
337	Aristolochene	26620-71-3	1487		22.85±14.03	21.33±12.37	19.76±4.1	32.75±6.99	33.34±1.16	40.01±15.88	41.11±6.37	32.63±10.42	33.15±10.84	21.58±7.25	37.69±16.72	32.65±12.82
338	2-Methyl-6-methyleneocta-2,7-dien-4-one	539-70-8	1145		43.02±3.02	23.52±1.09	77.33±6.86	28.31±5.33	52.39±3.73	31.26±1.79	38.54±2.59	27.86±5.7	121.31±5.31	37.73±0.78	113.09±11.93	28.06±1.44
339	7-Oxabicyclo[4.1.0]heptan-2-one, 3-methyl-6-(1-methylethyl)-	5729-99-7	1261		36.91±6.3	14.89±1.51	45.77±3.88	21.29±1.82	55.04±3.63	31.11±3.93	32.37±0.41	23.29±4.29	64.85±10.16	28.72±0.61	60.87±6.36	28.9±3.31
340	cis-.beta.-Farnesene	28973-97-9	1444	citrus green	37.14±6.06	25.23±6.4	10.26±1.73	25.99±1.42	106.32±4.69	274.71±16.74	47.73±3.34	5.4±1.13	13.2±0.83	19.39±3	12.33±3.05	26.86±2.75
341	(E)-.beta.-Famesene	18794-84-8	1457	woody citrus herbal sweet	37.65±7.64	25.03±6.79	10.5±2.09	24.98±2.65	106.38±6.5	273.48±17.27	48.59±3.69	5.45±1.46	13.36±1.74	18.98±1.89	11.92±3.11	27.31±1.54
342	1,6,10-Dodecatriene, 7,11-dimethyl-3-methylene-	77129-48-7	1458		37.79±7.24	25.7±6.15	10.72±2.16	26.9±1.49	106.38±6.5	272.24±13.02	49.14±4.18	6.1±1.37	13.39±1.7	18.93±1.82	12.03±2.95	27.3±1.53
343	Cyclohexanone, 5-methyl-2-(1-methylethenyl)-	529-00-0	1179		31.11±6.16	54.27±15.9	38.62±4.96	17.95±2.07	39.2±1.96	35.09±3.69	28.87±2.39	30.35±3.52	55.36±10.87	51.16±5.32	53.56±7.66	49.93±2.4
344	Linalyl acetate	115-95-7	1257	sweet green citrus bergamot lavender woody	35.5±7.12	5.59±1.21	39.09±4.57	6.62±1.14	54.94±3.73	28.05±0.75	20.9±1.17	11.42±2.09	259.78±57.71	20.89±1.65	237.7±41.54	46.92±0.71
345	.beta.-Phellandrene	555-10-2	1031	mint terpentine	33.76±3.29	61.78±5.31	38.55±4.52	71.37±3.92	70.9±6.23	82.9±9.44	42.14±2.09	38.09±1.09	29.5±4.01	51.67±4.33	31.1±1.86	50.15±5.39
346	trans-Citral	141-27-5	1270	citrus lemon	35.96±6.31	32.49±0.99	19.99±3.06	23.54±1.99	194.82±8.12	199.84±11.93	51.75±8.69	16.86±4.15	22.36±1.26	31.74±2.1	27.41±4.28	20.42±3.16
347	2,6-Dimethyl-2-trans-6-octadiene	2609-23-6	993		32.44±3.97	8.76±1.05	33.29±2.91	16.55±1.46	0±0	24.37±4.27	25.95±4.33	14.06±0.54	35.09±2.5	25.07±4.85	0±0	18.65±1.87
348	Tricyclo[2.2.1.0(2,6)]heptane, 1,3,3-trimethyl-	488-97-1	890		27.41±0.37	19.09±2.9	56.22±0.96	18.08±0.57	61.14±8.99	27.4±2.1	59.97±7.1	29.89±4.86	90.28±3.16	29.39±3.4	88.99±3.56	38.9±5.31
349	Copaene	3856-25-5	1376	woody spicy honey	26.26±3.92	70.33±19.41	26.16±0.6	65.84±5.67	213.64±10.34	97.67±3.67	56.5±6.19	39.07±12.41	67.84±5.12	32.4±2.73	72.84±8.36	40.87±4.18
350	Levomenthol	2216-51-5	1171	peppermint cooling mentholic minty	26.71±3.59	22.02±1.42	27.09±3.79	15.89±1.65	50.84±2.23	17.09±2.79	37.59±7.08	18.65±0.88	43.67±4.32	33.34±1.7	45.31±9.43	21.64±1.3
351	(R)-Citronellol	1117-61-9	1220	citronella oil rose leaf oily petal	21.44±2.65	6.54±1.47	21.61±3.13	10.66±2.33	24.25±7.75	19.01±3.61	20.44±1.42	13.23±3.31	24.9±5.67	15.13±1.68	15.39±3.23	21.32±1.35
352	2-Methyl-6-(p-tolyl)hept-2-en-4-ol	38142-57-3	1583		21.56±3.9	13.15±3.82	6.12±1.12	10.83±1.19	43.12±3.93	121.11±8.17	18.22±2.91	1.99±0.15	8.08±1.14	8.59±1.27	7.43±0.42	16.45±2.71
353	o-Mentha-1(7),8-dien-3-ol	15358-81-3	1201		21.3±3.83	23.11±2.27	12.58±1.16	24.68±2.49	162.27±8.85	186.67±7.56	22.02±0.98	6.19±1.63	15.74±0.59	11.43±1.11	19.09±1.7	15.54±0.2
354	p-Menth-3-en-1-ol	586-82-3	1137	dry woody musty	18.47±2.12	12.71±1.64	45.45±4.5	9.9±1.46	9.44±0.38	7.24±1.26	36.76±7.24	19.87±3.15	95.84±13.29	30.91±2.06	101.4±8.64	18.4±2.73
355	(-)-Bornyl acetate	5655-61-8	1287	sweet balsamic woody fresh pine needle herbal	17.34±3.72	16.25±2.94	15.34±1.3	18.46±1.16	65.79±2.42	81.39±4.03	26.81±4.48	11.07±0.84	16.05±2.23	25.04±0.67	20.96±2.39	16.05±1.16
356	Panaxene	871660-95-6	1314		14.82±2.97	15.18±3.08	12.52±0.68	16.12±2.73	65.99±3.46	74.99±1.96	25.19±1.57	9.82±0.17	11.21±3	19.93±1.44	14.34±2.59	12.4±1.66
357	Verbenone	80-57-9	1205	camphor menthol celery	14.86±2.56	7.85±2.22	14.47±0.49	7.61±0.48	52.48±4.57	41.93±2.13	14.75±1.39	7.37±0.27	29.05±5.22	9.32±0.76	31.22±4.52	9.49±0.9
358	(Z)-2,2-Dimethyl-3-(3-methylpenta-2,4-dien-1-yl)oxirane	33281-83-3	1133		14.24±2.99	10.35±1.42	36.03±2.87	10.79±0.34	16.02±2.65	13.55±1.06	31.54±4.09	22.9±2.09	76.29±7.93	30.7±3.36	73.77±0.45	20.54±3.45
359	isoledene	95910-36-4	1375		13.59±2.79	33.27±10.24	13.43±0.26	32.45±3.78	112.92±5.01	49.49±0.88	25.48±2.68	18.62±4.29	30.83±3.26	16.44±1.03	34.85±4.35	21.17±0.38
360	Neryl alcohol	106-25-2	1228	sweet natural neroli citrus magnolia	13.35±2.06	3±0.4	35.73±1.89	3.55±1.3	10.48±0.62	7.31±0.31	11.75±0.6	6.86±0.74	78.5±9.11	18.79±3.41	90.1±12.19	11.18±1.59
361	(Z)-iso-Geraniol	5944-20-7	1240	Lemon, Peach, Rose	12.00±3.00	4.79±1.26	7.09±0.38	5.91±0.81	11.25±2.11	15.23±0.35	8.6±0.21	7.6±0.86	8.86±2.38	8.14±0.66	5.64±1.36	9.44±0.8
362	[1α,4aα,8aα]-1,2,4a,5,6,8a-hexahydro-4-7-dimethyl-1-[1-methylethyl]naphthalene	31983-22-9	1496		9.64±2.66	13.21±5.35	7.6±0.94	19.3±2.41	15.1±1.7	30.54±8.98	11.9±0.6	13.12±2.27	11.9±2.11	12.08±2.57	10.13±1.9	16.75±1.78
363	(+)-neodihydrocarveol	18675-33-7	1226		12.74±1.14	5.26±1.54	42.46±2.01	5.87±0.69	19.73±1.93	11.84±1.86	14.65±0.9	5.83±0.79	81.46±5.71	20.13±2.17	93.2±8.37	13.93±1.8
364	.alpha.-Cubebene	17699-14-8	1351	herbal waxy	12.37±2.53	24.89±6.46	8.42±0.44	27.04±4.18	187.23±6.96	80.04±2.6	13.22±1.67	11.16±3.51	15.66±2	19.87±1.75	19.24±2.24	16.29±2.23
365	(-)-Camphor	464-48-2	1145	camphor	10.89±0.7	13.29±0.94	6.91±1.04	16.74±1.79	86.34±5.45	112.21±6.69	9.78±1.93	3.03±0.34	8.82±1.15	6.26±1.97	10.79±0.39	11.42±0.94
366	.alpha.-Muurolene	10208-80-7	1499	woody	8.97±1.97	14.28±6.49	6.94±0.55	18.28±0.73	13.76±0.65	31.8±9.75	11.01±1.07	11.47±2.8	9.04±1.09	11.55±2.37	7.38±0.71	14.85±0.96
367	Zingiberene	495-60-3	1495	spice fresh sharp	7.05±1.94	8.25±3.14	5.61±0.89	12.05±2.63	8.28±1.92	13.25±3.79	7.14±0.51	8.62±1.09	6.87±1.4	7.51±1.92	6.18±1.05	9.78±1.68
368	(1S,2E,6E,10R)-3,7,11,11-Tetramethylbicyclo[8.1.0]undeca-2,6-diene	24703-35-3	1495	green woody weedy	7.45±1.97	10.31±3.84	6.17±0.5	17.51±2.15	11.05±0.31	25.59±5.84	11.17±1.16	9.97±2.05	10.02±1.59	9.65±1.97	9.14±2.65	13.61±1.86
369	Eremophilene	10219-75-7	1494		6.72±2.63	6.47±2.21	6±0.73	10.64±3.49	8.03±1.89	17.26±7.22	10.54±1.27	6.32±0.85	7.06±1.55	6.48±2.16	9.62±1.49	8.53±1.94
370	Geranic acid	459-80-3	1355	dry weedy acidic green moldy feet woody	9.95±2.85	5.25±1.14	8.38±1.4	6.28±0.86	14.52±0.1	17.72±0.56	9.8±0.63	10.24±2.69	8.75±1.16	9.74±0.87	8.69±1.06	7.79±0.57
371	cis-p-Mentha-2,8-dien-1-ol	3886-78-0	1140		8.64±0.77	6.02±0.94	18.53±1.53	10.99±1.04	23.36±9.86	32.63±2.67	38.36±9.54	44.04±5.97	42.54±3.25	37.13±5.14	51.12±10.54	30.99±3.13
372	(+)-2-Bornanone	464-49-3	1144	camphor minty phenolic herbal woody	8.75±0.02	9.97±0.89	4.01±0.29	11.16±1.24	68.8±3.12	110.41±14.3	7.28±1.68	2.17±0.74	7.73±1.33	4.55±0.6	8.66±0.83	8.45±0.33
373	Cyclohexanone, 5-methyl-2-(1-methylethyl)-	10458-14-7	1169		9.09±1.45	6.61±0.79	7.95±0.94	4.17±1.01	12.94±1.41	7.73±1	13.56±2.25	7.12±1.08	12.08±1.4	11.58±0.91	13.22±2.36	6.78±1.31
374	2-Methylisoborneol	2371-42-8	1198		8.82±1.6	6.12±1.73	11.16±2.54	7.08±1.19	29.49±1.76	33.01±1.16	8.4±1.63	5.09±0.46	16.91±3.73	8.17±0.89	16.19±3.16	11.78±1.57
375	Spiro[4.5]dec-7-ene, 1,8-dimethyl-4-(1-methylethenyl)-, [1S-(1.alpha.,4.beta.,5.alpha.)]-	24048-44-0	1471		6.94±1.54	6.57±2.08	6.13±1.09	9.72±1.13	34.47±0.75	30.26±0.91	9.13±0.54	7.09±0.56	12.43±2.17	5.73±0.43	10.84±1.27	9.03±0.87
376	1-Isopropyl-4,7-dimethyl-1,2,3,5,6,8a-hexahydronaphthalene	16729-01-4	1469		6.45±1.26	5.75±2.17	6.42±1.33	8.2±1.34	28.94±1.25	22.8±4.96	9.29±0.41	7.34±1.93	10.92±1.9	4.91±0.83	11.13±2.18	9.15±2.14
377	6-Octen-1-ol, 7-methyl-3-methylene-	13066-51-8	1195		8.03±1.03	5.36±0.52	7.91±0.4	2.72±0.26	10.06±0.66	9.46±1.07	14.64±1.77	7.96±1.42	15.5±1.76	13.47±0.99	14.7±3.24	6.53±0.94
378	2,6,10-Dodecatrienal, 3,7,11-trimethyl-, (E,E)-	502-67-0	1737		3.6±1.52	2.46±1.09	6.45±1.1	11.23±2.06	283.35±10.62	17.95±1.49	10.64±1.34	4.05±0.39	10.64±2.25	4.68±1.58	14.38±5.36	15.53±3.94
379	3a,7-Methano-3aH-cyclopentacyclooctene, 1,4,5,6,7,8,9,9a-octahydro-1,1,7-trimethyl-, [3aR-(3a.alpha.,7.alpha.,9a.beta.)]-	469-92-1	1440		6.19±1.36	4.82±1.07	2.38±0.49	4.88±0.74	14.88±1.58	32.69±1.79	7.73±0.37	1.9±0.05	3.9±0.6	3.45±0.68	3.33±0.46	4.84±0.1
380	(-)-cis-Isopiperitenol	96555-02-1	1228		5.45±0.09	2.55±0.59	23.04±1	3.62±0.51	15.26±1.21	5.45±0.31	5.44±0.56	2±0.38	45.62±3.91	9.36±0.33	56.86±4.67	6.72±0.43
381	Myroxide	28977-57-3	1141		6.01±0.9	1.06±0.15	24.78±1.85	3.93±0.13	7.12±0.14	6.24±0.41	9.05±2.25	8.23±2.37	48.61±1.41	15.57±1.05	55.66±5.43	7.28±1.26
382	Naphthalene, 1,2,4a,5,6,8a-hexahydro-4,7-dimethyl-1-(1-methylethyl)-,[1R-(1.alpha.,4a.alpha.,8a.alpha.)]-	17627-24-6	1440		4.67±1.16	3.69±0.71	2.77±0.42	3.44±0.2	13.66±0.53	23.98±1.52	5.79±0.2	2.13±0.14	2.69±0.63	2.34±0.29	2.54±0.46	4.49±0.21
383	Farnesol	4602-84-0	1714	mild fresh sweet linden floral angelica	3.23±1.17	2.85±1.15	6.73±1.15	11.02±1.23	274.17±6.39	18.18±1.11	10.42±1.42	4.31±0.62	10.65±2.52	4.63±1.32	12.87±4.68	15.43±4.18
384	Citronellyl tiglate	24717-85-9	1658	rose fruity floral geranium leafy tea	4.01±0.73	1.3±0.23	6.6±1.88	4.27±0.05	28.51±1.02	13.74±0.9	5.19±1.25	2.67±0.02	13.84±4.24	4.27±0.66	11.74±3.58	12.19±0.9
385	Bicyclo[3.2.1]oct-2-ene, 3-methyl-4-methylene-	49826-53-1	1168		4.96±0.92	4.26±1.15	8.07±1.17	6.47±0.37	18.83±2.03	13.73±0.81	6.04±0.58	3.78±0.06	8.94±2.59	9.33±0.69	10.99±2.55	9.33±0.22
386	D-Verbenone	18309-32-5	1228		3.11±0.96	0.71±0.3	11.85±0.43	0.78±0.43	1.03±0.27	1.24±0.53	3.83±0.19	2.35±0.68	27.93±2.47	6.19±1.05	31.62±2.55	3.72±1.29
387	4-(1-methylethyl)-Benzaldehyde	122-03-2	1239	spicy cumin green herbal	4.29±0.68	6.18±1.03	1.64±0.64	3.61±0.41	30.84±1.36	28.24±1.76	6.13±1.26	0.86±0.37	2.01±0.48	4.27±0.53	2.28±0.71	3.09±1.16
388	(4R,4aS,6S)-4,4a-Dimethyl-6-(prop-1-en-2-yl)-1,2,3,4,4a,5,6,7-octahydronaphthalene	823810-22-6	1476		3.6±1.26	4.31±1.39	3.93±0.79	4.92±0.65	19.13±1.33	16.82±1.34	5.17±0.47	4.83±1.09	7.65±1.31	4.27±0.88	6.96±0.99	5.51±1.04
389	trans-Farnesol	106-28-5	1722	mild muguet floral sweet lily waxy	2.78±0.53	1.73±0.28	4.36±0.73	9.11±2.78	199.4±8.38	12.78±1.08	7.24±0.84	3.04±0.45	8.64±1.99	3.6±0.79	7.36±2.46	9.85±2.12
390	(3S,3aS,6R,8aS)-3,8,8-Trimethyl-7-methyleneoctahydro-1H-3a,6-methanoazulene	31145-21-8	1444		3±0.58	1.88±0.08	0.91±0.19	2.18±0.24	5.89±0.35	13.32±0.78	3.2±0.16	1.55±0.11	1.33±0.18	1.32±0.24	1.86±0.09	2.13±0.51
391	1,5-Heptadien-4-ol, 3,3,6-trimethyl-	27644-04-8	1084		3.85±0.81	4.12±0.76	4.16±0.62	3.11±0.33	0.96±0.37	2.68±0.16	3.21±0.59	2.95±0.4	1.88±0.28	4.47±0.08	2.07±0.24	2.44±0.6
392	1-methyl-4-(propan-2-ylidene)cyclohexan-1-ol	586-81-2	1197	terpineol lilac	1.67±0.42	2.65±0.93	2.02±1.34	2.43±0.44	10.95±0.72	12.07±1.07	2.47±0.64	1.49±0.93	2.55±0.53	1.84±0.5	2.95±0.63	1.96±0.3
393	(1.alpha.,2.beta.,5.alpha.)-2-methyl-5-(1-methylethenyl)-Cyclohexanol	38049-26-2	1192		1.46±0.28	2.32±0.75	1.68±1.27	2.19±0.3	10.69±0.58	11.48±1.06	1.55±0.68	1.51±0.63	2.43±0.62	2.17±0.61	1.82±0.42	1.79±0.48
394	5,7-Octadien-4-one, 2,6-dimethyl-, (Z)-	3588-18-9	1155		1.92±0.54	2.24±0.37	2.84±0.07	1.58±0.54	4.51±0.37	1.64±0.46	2.08±0.52	1.65±0.41	6.48±2.04	2.03±0.71	6.06±0.83	2.12±0.8
395	(+)-(E)-Limonene oxide	6909-30-4	1139	green	1.62±0.97	1.35±0.35	3.01±0.33	2.13±0.61	2.42±1.43	2.85±1.23	2.28±0.51	2.93±0.36	5.7±0.42	3.59±0.33	6.04±1.43	2.23±0.56
	Acid
396	2-Methylpentanoic acid	97-61-0	959	sour cheese	1330.92±126.04	1338.75±141.02	1456.27±59.94	1305.09±74.5	1379.9±46.4	1372.39±45.96	1400.23±59.98	1604.11±50.09	1377.56±33.4	1280.96±58.89	1409±97.91	1259.66±64.75
397	Tiglic Acid	80-59-1	941	sweet dry spicy woody caramel	1211.81±117.73	1332.49±116.33	1848.76±147.56	1090.96±43.88	1681.53±105.8	756.16±84.26	1547.72±79.73	1261.68±87.8	1645.21±131.41	1187.44±96.58	1702.01±171.38	1271.07±121.97
398	Acetic Acid, phenoxy-	122-59-8	1389	sour sweet	70.82±9.78	42.23±14.24	87.03±14.05	120.34±4.67	155.26±6.13	155.74±9.6	62.78±7.41	33.9±4.66	76.14±20.73	119.71±6.39	70.26±16.12	111.27±8.47
399	trans-Cinnamic Acid	140-10-3	1451	balsam sweet storax	71.15±13.79	48.01±11.73	18.88±2.52	45.93±4.89	189.77±9.04	464.72±26.14	89.71±6.94	8.11±0.49	26.03±4.3	35.77±4.53	20.48±3.41	49.76±3.44
400	Benzeneacetic acid	103-82-2	1262	sweet honey floral honeysuckle sour waxy civet	36.11±6.87	5.96±1.08	39.35±3.02	6.64±0.57	49.17±2.17	22.31±0.58	18.4±0.73	12.34±2.32	266.55±61.42	21.01±1.98	246.44±45.25	47.45±3.57
401	3-Pentenoic Acid, 2,2-dimethyl-	16642-52-7	997		30.91±0.92	27.67±1.36	161.22±2.67	19.34±0.59	65.7±1.75	20.31±1.78	46.93±6.02	30.4±6.61	274.18±16.09	60.91±6.77	302.9±14.35	33.6±4.52
402	Pentanoic Acid	109-52-4	901	sickening putrid acidic sweaty rancid	20.4±2.34	10.09±0.41	40.24±2.29	12.53±2.05	47.85±3.99	13.26±0.55	31.47±4.17	16.32±4.02	80.51±3.88	28.17±0.56	81.37±5.88	24.72±1.9
403	Valproic Acid	99-66-1	1116		4.3±1.36	3.03±0.58	5.84±1.62	3.38±0.41	6.53±0.96	4.04±0.47	4.44±0.56	3.33±0.71	5.53±0.16	2.73±0.79	5.44±0.15	3.5±0.37
404	Butanoic Acid	107-92-6	802	sharp acetic cheese butter fruit	0±0	0±0	3.03±0.48	1.53±1.21	15.51±0.46	3.59±0.53	1.49±0.29	0.64±0.45	3.7±0.63	1.43±0.43	3.09±0.69	2.74±0.82
	Aldehyde
405	CyclohexanecarboxAldehyde	2043-61-0	963		6617.98±663.1	5044.93±65.59	8737.07±400.26	3217.42±117.63	6078.07±183.91	2394.51±154.81	11830.1±709.68	8045.11±773.57	13374.82±713.16	5677.57±361.41	14416.92±766.73	5466.68±567.82
406	BenzAldehyde, 4-ethoxy-	10031-82-0	1334	sweet spicy floral anisic	762.52±358.87	439.33±186.77	614.22±82.05	713.65±86.38	378.55±47.87	368±25.53	1013.36±114.36	1049.16±310.41	749.04±334.35	683.27±331.31	737.59±315.61	450.09±136.98
407	trans-2-Methyl-2-butenal	497-03-0	745	strong green fruit	453.97±21.47	296.91±29.35	559.13±67.64	145.01±3.08	210.27±12.17	188.02±19.14	322.93±9.04	1025.84±178.61	716.09±65.24	410.7±64.04	668.4±53.01	300.61±39.16
408	trans-2-Hexenal	6728-26-3	854	green banana aldehydic fatty cheesy	440.3±25.03	207.83±75.88	1449.95±54.54	300.14±29.02	1439.65±53.27	826.94±109.5	332.39±27.9	407.38±102.15	1858.26±59.38	503.27±28.3	1591.99±68.39	1028.69±248.98
409	2-Hexenal	505-57-7	853	sweet almond fruity green leafy apple plum vegetable	408.03±32.31	206.51±76.97	1430.39±66.8	296.16±30.1	1437.68±51.89	769.4±99.3	299.46±24.1	381.61±81.11	1844.02±49.99	510.44±90.96	1591.99±68.39	1094.4±210.02
410	(E)-2-Octenal	2548-87-0	1060	fresh cucumber fatty green herbal banana waxy green leaf	402.11±48.3	323.08±27.05	393.46±11.02	353.05±23.58	393.65±55.1	304.85±6.36	353.73±32.26	250.33±5.64	349.2±43.84	277.32±16.89	350.77±46.88	279.91±8.04
411	2,6,6-Trimethylcyclohexa-1,4-dienecarbAldehyde	162376-82-1	1109		271.32±53.41	31.17±9.09	437.59±48.9	20.01±2.89	437.47±46.72	39.95±4.78	849.12±85.81	60.86±7.13	1243.96±94.82	47.4±3.76	1397.52±30.74	107.34±23.76
412	(2E,4E)-2,4-Octadienal	30361-28-5	1115	green fatty reminiscent of pear melon peely	173.09±40.4	19.36±6.03	291.64±27.62	16±1.67	312.25±30.86	27.43±4.99	571.15±58.95	41.87±2.55	858.13±61.73	32.85±2.71	973.32±25.08	75.8±17.56
413	BenzeneacetAldehyde, .alpha.-methyl-4-(2-methylpropyl)-	51407-46-6	1464		204.33±39.54	136.09±30.63	52.55±7.2	125.7±10.36	448.55±30.24	986.71±49.61	229.49±15.58	20.77±2.04	64.69±8.56	97.02±11.28	57.03±8.18	127.47±11.54
414	2-Cyclohexene-1-carboxaldehyde, 2,6,6-trimethyl-	432-24-6	1116		172.05±39.96	19.64±5.61	290.85±27.09	14.4±4.01	308.08±32.34	22.68±2.6	571.15±58.95	41.58±2.93	858.18±61.7	31.59±1.52	973.52±25.16	72.28±17.06
415	2-Isopropyl-5-methylhex-2-enal	35158-25-9	1106	herbal lavender woody green blueberry tomato	179.29±37.2	134.13±21.35	183.59±10.53	153.04±16.84	135.58±14.45	123.97±1.11	196.29±2.46	152.35±10.75	207.86±36.06	148.54±34.37	184.54±12.6	129.16±11.67
416	6-Nonenal	2277-20-5	1124	cucumber violet leaves	149.24±13.62	74.57±3.08	172.05±13.98	58.48±4.14	206.55±17.43	100.64±17.52	191.25±24.17	70.28±5.05	198.74±15.38	67.83±1.75	203.55±18.74	116.45±15.4
417	4-Heptenal	62238-34-0	899		128.04±15.97	91.73±6.61	254.75±29.38	117.38±3.66	389.15±8.51	136.52±27.99	283.39±49.16	184.73±8.76	475.79±32.35	235.59±13.91	476.34±19.22	237.56±22.71
418	BenzAldehyde, 2-methyl-	529-20-4	1064	cherry	84.67±6.7	121.68±5.07	130.86±3.81	224.06±16.57	241.3±4.12	208.07±3.93	139.1±7.66	73.76±3.25	145.65±15.45	99.47±3.48	168.54±0.64	182.47±20.49
419	(E)-2-Nonenal	18829-56-6	1162	fatty green cucumber aldehydic citrus	59.79±9.34	41.17±3.48	56.66±5.92	31.23±2.55	92.4±5.9	47.41±3.99	85.79±15.45	42.06±7.17	90.89±9.02	71.9±8.27	99.17±13.53	45.14±6.71
420	ParAldehyde	123-63-7	776	sweet aromatic	43.99±3.38	43.52±1.92	49.07±4.21	25.11±0.79	104.56±6.06	28.58±3.55	43.43±6.61	32.36±7.81	68.64±3.35	36.55±4.48	65.86±1.69	36.73±4.69
421	3-MethoxycinnamAldehyde	56578-36-0	1451		42.04±8.61	28.31±6.35	11.25±1.53	27.33±1.77	101±5.75	229.63±10.47	49.73±2.81	4.8±0.65	14.1±2.2	20.26±1.33	12.04±2.18	28.06±2.44
422	Undecanal	112-44-7	1307	waxy soapy floral aldehydic citrus green fatty fresh laundry	34.11±4.74	22.4±2.56	30.98±2.07	27±3.7	26.63±2.23	23.14±1.35	32.77±1.08	35.8±5.64	28.46±4.17	25.17±1.97	28.7±2.81	22.85±2.42
423	(1R)-(-)-Myrtenal	18486-69-6	1136	sweet cinnamon tonka spicy terpene camphor jam	28.98±5.14	14.97±3.54	53.33±7.78	16.24±2.32	24±2.61	20.81±1.77	55.28±5.3	31.68±1.46	105.81±15.29	44.31±9.13	100.18±6.42	31.61±5.18
424	2-Decenal, (Z)-	2497-25-8	1252		32.74±3.41	19.44±1.28	40.79±6.11	18.28±2.07	48.27±5.66	23.23±4.42	29.52±1.99	19.52±5.45	89.94±19.58	24.5±2.18	85.82±10.09	29.39±1.33
425	2-Nonenal	2463-53-8	1161	fatty green waxy cucumber melon	32.88±5.18	25.52±1.2	30.02±2.48	21.14±0.58	36.55±4.26	22±2.67	35.61±4.66	23.14±2.67	40.64±2.17	29.25±3.02	41.17±5.42	19.79±4.37
426	BenzAldehyde, 4-methyl-	104-87-0	1079	fruity cherry deep phenolic	29.96±2.86	26.62±6.03	31.41±1.02	26.93±1.44	32.12±21.71	1.77±0.76	26.88±15.48	11.75±1.26	36.79±5.46	28.5±2.07	37.95±4.31	29.58±1.3
427	4-Isopropylcyclohexa-1,3-dienecarbAldehyde	1197-15-5	1283		30.19±5.33	32.62±3.85	17.87±0.71	29.27±3.7	163.51±5.96	199.45±11.5	50.09±3.62	10.74±0.76	18.09±2.41	45.68±1.36	22.43±2.21	21.99±1.91
428	Pentanal	110-62-3	732	fermented bready fruity nutty berry	28.95±2.8	24.82±3.85	24.31±2.09	26.29±2.87	28.06±1.56	27.8±1.63	36.61±4.89	26.03±6.07	27.89±0.94	26.84±1.79	32.57±0.67	23.37±4.05
429	Heptanal	111-71-7	903	fresh aldehydic fatty green herbal wine-lee ozone	28.03±2.21	30.7±2.32	40.23±0.98	39.9±1.64	74.27±3.63	46.75±3.34	39.9±3.8	27.39±1.84	40.17±1.76	47.1±1.87	36.57±1.95	43.37±2.86
430	2-Heptenal, 2-methyl-	30567-26-1	990		31.87±4.2	8.92±3.15	19.44±1.54	12.6±1.44	5.45±1.82	20.29±3.83	21.33±4.94	12.52±1.34	16.88±0.87	22.97±6.87	7.97±1.51	9.94±4.06
431	(E)-2-Decenal	3913-81-3	1263	waxy fatty earthy green cilantro mushroom aldehydic fried chicken fat tallow	20.76±2.67	10.33±0.56	27.74±1.94	13.52±1.45	30.05±4.04	13.6±0.97	17.09±2.25	13.87±1.78	37.79±5.78	16.88±1.25	35.74±2.54	16.45±1.84
432	BenzAldehyde, 4-hydroxy-	123-08-0	1364	sweet nutty almond balsam woody	20.76±2.23	22.4±3.6	3.89±0.58	15.75±1.75	132.41±19.2	171.79±19.42	40.58±4.38	3.8±0.63	3.99±0.62	17.68±0.05	3.61±0.62	6.88±0.23
433	6-Octenal, 7-methyl-3-methylene-	55050-40-3	1147	juicy aldehydic lemongrass floral lemon bois de rose	23.31±2.54	19.21±2.33	26.49±2.52	15.08±1.98	26.65±5.51	17.52±1.39	21.75±3.23	18.45±2.91	23.84±4.84	17.09±3.86	24.92±4.6	10.81±3.39
434	4-Decenal, (E)-	65405-70-1	1198	fresh aldehydic citrus orange mandarin tangerine green fatty	22.43±2.85	12.82±0.36	21.62±2.42	11.71±1.59	21.47±1.57	20.53±1.54	34.86±4.3	22.34±3.12	25.72±0.36	25.22±2.79	26.7±4.31	14.45±2.55
435	cis-4-Heptenal	6728-31-0	900	oily fatty green dairy milky creamy	25.74±3.45	16±4.17	26.72±0.55	18.92±1.43	31.84±11.16	51.11±7.66	68.12±17.09	95.7±19.13	67.19±13.36	68.9±16.53	62.62±3.55	72.99±0.51
436	Lilac Aldehyde D	53447-47-5	1169	sweet flowery	20.03±3.2	14.71±0.02	20.27±2.2	10.73±1.94	31.99±1.94	18.17±0.77	31.57±5.72	15.04±1.73	32.43±3.18	31.73±2	35.33±3.84	18.15±2.09
437	(E)-2-Methyl-2-pentenal	623-36-9	837	aldehydic green cortex fruity alliaceous ripe cherry earthy	21.36±2.6	16.56±2.31	12.3±3.72	11.52±1.41	8.7±3.28	5.83±2.21	5.35±1.75	3.79±0.84	4.76±0.86	5.72±2.58	4.31±0.98	2.83±1.7
438	IsophthalAldehyde	626-19-7	1284		17.18±2.6	18.25±2.63	12.07±0.35	17.28±1.43	88.78±3.1	109.65±5.21	29.13±2.41	8±1.22	11.73±2.15	28.35±0.65	13.87±0.92	14.48±0.86
439	(2E,4E)-deca-2,4-dienal	25152-84-5	1317	oily cucumber melon citrus pumpkin nut meat	11.59±3.24	8.06±2.5	11.03±0.4	11.02±1.81	16.67±0.71	22.45±1.18	16.26±1.01	9.15±0.89	13.76±4.04	14.82±0.98	12.68±3.39	9.04±1.36
440	3-Methylbutanal oxime	626-90-4	864		13.36±2.44	12.09±1	66.16±3.82	9.72±0.9	82.31±1.98	23.57±0.49	20.67±2.45	10.78±1.77	75.19±2.37	20.46±4.25	78.63±4.58	30.71±2.71
441	cis-7-Decen-1-al	21661-97-2	1212	citrus aldehydic cucumber	12.21±1.51	7.14±0.89	10.74±1.01	10.13±1.2	9.54±2.21	8.08±0.26	9.48±1.2	7.64±1.87	5.32±0.92	7.5±0.89	6.94±0.79	5.49±0.93
442	2,4-Dimethylbenzaldehyde	15764-16-6	1182	naphthyl cherry almond spice vanilla	16.05±3.53	32.9±24.76	22.8±2.77	17.48±6.08	17.64±4.43	16.48±2.82	16.62±5.05	28.7±14.36	22.02±5.78	18.23±6.26	11.81±2.07	15.94±2.69
443	(E)-CinnamAldehyde	14371-10-9	1270	sweet spice candy cinnamon red hots warm	9.2±1.65	10.05±0.69	2.75±0.63	4.82±0.48	71.01±3.62	73.2±3.62	12.98±1.76	1.81±0.52	2.95±0.39	8.1±0.39	3.77±0.35	4.35±0.54
444	4-(4-Methyl-3-pentenyl)cyclohex-3-ene-1-carbaldehyde	37677-14-8	1540	citrus greasy aldehydic floral marine	7.95±1.64	2.71±1.07	6.28±1.72	3.72±0.23	13.19±0.64	8.19±0.96	11.67±1.12	13.04±3.63	12±3.26	7.44±0.1	8.29±2.02	6.87±1.58
445	OxiranecarboxAldehyde, 3-methyl-3-(4-methyl-3-pentenyl)-	16996-12-6	1234		9.42±2.1	2.82±0.22	8.02±1.01	6.06±0.87	6.14±1.16	6.17±0.45	7.49±0.33	7.12±0.97	15.03±1.93	7.81±1.68	12.61±1.71	7.83±0.44
446	3-Hexenal	4440-65-7	810	leafy green stem tomato melon apple	8.75±0.13	7.87±0.36	20.64±0.85	6.03±0.56	78.07±2.25	20.79±9.63	9.41±0.66	8.56±1.67	29.44±4.02	10.87±1.27	25.22±1.73	18.52±2.6
447	(S)-4-(prop-1-en-2-yl)cyclohex-1-enecarbaldehyde	18031-40-8	1207	fresh green oily grassy fatty mint cherry	8.61±1.26	9.66±1.46	5.6±0.91	9.31±0.81	41.68±2.75	54.65±2.99	8.56±0.01	3.22±0.25	5.31±0.63	5.89±0.59	7.02±1.39	6.04±0.48
448	2-Propenal, 3-(dimethylamino)-	927-63-9	764		9.01±1.57	9.18±2.55	51.81±5.09	3.59±0.41	56.65±2.53	31±9.98	14.36±1.26	6.66±1.23	42.66±2.92	18.76±2.58	42.29±0.68	22.14±2.68
449	3-Methylbenzaldehyde	620-23-5	1071	sweet fruity cherry benzaldehyde phenolic	8.22±1.63	7.8±0.79	10.33±0.32	5.58±2.88	7.88±1.89	9.82±1.97	18.87±5.35	16.04±4	15.61±2.68	10.51±3.81	18.26±3.58	10.85±1.02
450	Perillyl aldehyde	2111-75-3	1274	fresh green herbal grassy sweet mint cumin	5.7±1.51	5.46±1.85	5.56±1.14	4.02±0.85	15.01±0.39	17.28±0.65	7.11±1.23	4.36±0.74	5.39±1.29	7.07±1.24	6.73±0.96	3.78±0.4
451	cis-3-Hexenal	6789-80-6	800	green fatty grassy weedy fruity apple	6.13±0.53	5±0.96	19.11±2.67	7.32±0.37	82.03±5.02	11.4±0.64	6.59±0.58	6.2±1.63	25.31±2.06	8.99±1.54	26.31±1.74	14.81±1.16
452	Hexanal	66-25-1	801	fresh green fatty aldehydic grass leafy fruity sweaty	4.97±0.44	2.86±0.11	8.24±0.21	3.53±0.46	44.31±2.81	7.77±1.43	3.46±0.98	3.73±0.82	10.13±1.5	3.65±0.38	12.13±0.33	7.58±0.42
453	4-Methoxybenzaldehyde	123-11-5	1251	sweet powdery mimosa floral hawthorn balsam	4.54±0.68	3.18±0.21	1.83±0.1	1.87±0.24	39.1±2.68	42.45±2.02	5.07±0.32	1±0.23	3.68±0.79	3.56±0.6	3.45±0.55	2.22±0.56
454	4-ethyl benzaldehyde	4748-78-1	1180	bitter almond sweet anise	4.13±0.34	7.39±4.12	7.02±1.07	5.07±0.85	5.82±1.02	3.92±0.47	4.48±0.9	7.27±2.4	10.5±2.06	5.36±1.15	9.25±0.8	5.4±0.48
455	Isocyclocitral	1335-66-6	1163	green aldehydic earthy woody herbal leaf	4.73±0.96	3.82±0.92	4.89±1.17	5.91±1.17	8.29±0.47	7.28±0.89	4.39±0.81	3.44±0.26	6.51±1.15	4.42±0.36	9.39±0.35	5±0.67
456	BenzAldehyde, 2-ethyl-	22927-13-5	1176		1.39±0.37	1.15±0.2	2.68±0.46	1.77±0.26	13.15±0.79	8.34±0.64	2.87±0.59	0.94±0.37	2.82±0.43	2.16±0.19	2.76±0.13	4.15±0.42
	Ether
457	Benzene, (methoxymethyl)-	538-86-3	969	fruity ethereal ylang green floral hyacinth	2370.61±255.64	1736.48±21.26	3131.18±139.8	1020.28±34.58	2070.07±80.38	691.79±56.25	4384.08±279	2868.83±307.19	4989.67±307.69	1929.18±129.98	5380.28±337.59	1853.31±206.06
458	Benzene, (butoxymethyl)-	588-67-0	1267	floral rose	86.8±12.58	87.32±2.12	24.15±1.3	43.53±2.37	673.01±30.97	691.49±35.66	129.4±18.76	13.7±1.46	27.39±2.3	71.68±6.13	38.67±3.5	42.18±6.3
459	Benzene, 1-methoxy-4-(1-propenyl)-, (Z)-	25679-28-1	1254		1.19±0.31	0.52±0.13	1.23±0.42	0.48±0.37	1.35±0.3	0±0	0.5±0.06	0.46±0.08	9.15±2.26	0.93±0.2	7.96±1.73	1.4±0.12
	Halogenated hydrocarbons
460	Cyclopropanecarboxylic acid chloride	4023-34-1	733		403.24±35.5	230.71±47.73	485.41±32.81	112.96±2.82	181.63±6.29	148.89±18.55	260.38±18.64	864.47±148.69	608.31±53.31	341.59±55.62	604.98±28.6	242.16±23.39
461	Nonane, 1-iodo-	4282-42-2	1342		206.16±36.8	133.17±14.75	222.59±23.11	133.08±13.43	282.62±8.36	208.85±1.28	296.86±19.07	302.8±71.51	270.56±29.02	214.7±11.54	279.24±16.82	166.93±13.18
462	1-iodo-Decane	2050-77-3	1433		48.6±14.69	13.58±4	33.01±6.96	24.15±5.91	31.15±9.85	26.14±2.71	29.93±4.16	21.7±4.62	33.03±9.91	21.82±2.87	33.14±5.94	31.13±4.24
463	(2-bromoethyl)-Oxirane	13287-42-8	805		10.34±0.57	7.56±1.93	22.99±1.16	8.15±0.81	36.32±3.99	10.85±1.58	8.19±0.79	7.57±1.66	25.71±1.99	11.49±1.03	24.43±1.63	13.9±1.21
	Phenol
464	2-methoxy-Phenol	90-05-1	1089	phenolic smoke spice vanilla woody	167.27±13.29	264.98±18.8	188.06±0.79	261.82±16.17	138.15±2.77	218.08±2.04	214.05±6.88	191.93±6.3	119.56±12.29	328.72±16.2	140.38±4.59	187.69±22.39
465	p-Cresol	106-44-5	1077	phenolic narcissus animal mimosa	98.99±8.86	98.92±8.01	156.82±1.43	235.21±14.85	312.24±7.92	260.38±5.08	157.54±5.17	62.19±2.25	173.66±17.33	104.98±6.97	193.63±1.7	221.06±26.06
466	Phenol, 2-methoxy-4-(1-propenyl)-	97-54-1	1450	sweet spicy clove woody allspice carnation floral	27.1±5.95	17.09±5.13	7.72±1.44	19.23±1.39	89.8±4.1	256.43±13.65	39.61±3.4	2.86±0.58	9.85±1.85	13.2±0.86	8.9±1.58	20.73±1.05
467	Phenol, 2,3,6-trimethyl-	2416-94-6	1239		7.79±1.5	9.44±0.99	11.37±0.68	13.6±0.75	59.17±2.4	65.24±2.6	10.27±0.47	4.79±0.7	11.33±2.11	12.05±0.85	11.87±1	21.58±3.12
468	2-Hydroxynitrobenzene	88-75-5	1135	honey rose	6.67±0.92	2.51±0.25	32.63±1.22	1.68±0.12	2.83±0.29	2.85±0.42	7.25±0.39	4.91±0.11	66.86±5.5	17.35±0.73	76.54±5.31	6.61±0.31
469	Phenol, 4-ethyl-	123-07-9	1139	phenolic castoreum smoke guaiacol	4.91±0.77	2.27±0.42	15.81±2.21	3.46±0.7	9.17±0.77	6.1±0.97	5.68±0.25	4.93±1.47	34.05±4.23	9.38±0.56	37.88±2.59	6.02±0.71
470	Phenol, 2-ethyl-	90-00-6	1140	phenolic	4.36±0.25	2.3±0.38	14.71±1.14	3.03±0.11	9.23±0.8	5.88±0.83	5.94±0.38	4.29±1.15	31.19±2.06	7.4±1.03	32.61±2.73	5.33±0.68
	Aromatics
471	Cyclohexene, 1-methoxy-	931-57-7	1014	herb spice	164.77±10.09	111.28±4.19	494.08±9.34	92.15±2.69	215.57±6.35	113.35±8.58	223.21±10.35	193.32±12.3	636.81±43.54	216.77±9.28	707.06±18.27	187.79±15.65
472	Benzene, 1-methoxy-4-propyl-	104-45-0	1182	sweet anise licorice sassafrass fennel	16.38±2.98	27.49±7.44	15.24±0.22	11.62±0.76	11.62±1.3	10.88±0.45	16.05±0.77	22.57±1.27	25.53±6.68	18.77±2.59	26.32±4.23	13.77±2.38
473	TRANS-ANETHOLE	4180-23-8	1283	sweet anise licorice mimosa	14.19±2.47	14.34±1.22	5.21±0.39	8.67±0.69	90.69±3.33	104.72±4.83	22.3±2.85	2.97±0.61	6.71±0.75	13.84±1.38	7.61±0.5	8.39±0.45
474	Benzene, 1-ethenyl-4-methoxy-	637-69-4	1156	sweet	9.63±3.72	6.94±1.35	7.71±0.91	9.07±1.31	7.1±0.75	7.03±0.1	14.12±1.03	14.08±2.36	10.08±4.59	9.66±3.61	9.61±2.34	7.03±1.5
475	Naphthalene	91-20-3	1182		7.55±0.72	6.58±0.14	8.27±0.67	4.61±0.21	10.14±0.74	7.58±0.24	11.47±1.44	7.33±1.28	11.23±0.91	9.34±0.53	12.75±1.29	6.12±0.62
476	Benzene, (2-methoxyethyl)-	3558-60-9	1086	green floral chrysanthemum jasmin metallic rose	2.81±0.36	5.02±0.44	3.89±0.79	4.11±0.44	13.42±0.78	4.25±0.99	3.65±0.28	3.95±0.37	4.08±0.47	5.27±0.17	4.53±0.84	3.49±0.91
	Alcohol
477	1,4-Cyclohexadiene-1-methanol, 4-(1-methylethyl)-	22539-72-6	1330		660.28±328.07	369.77±170.55	561.86±78.07	610.64±76.85	346.01±42.14	320.24±21.03	872.45±110.56	918.72±288.2	711.74±315.86	562.91±309.6	695.78±291.82	395.33±120.03
478	1-Hexanol, 2-ethyl-	104-76-7	1030	citrus fresh floral oily sweet	618.91±185.95	269.14±93.45	647.28±107.58	525.03±45.86	248.5±15.31	462±29.05	688.57±120.85	761.09±63.9	872.46±267.34	681.7±283.83	691.71±165.76	535.1±77.15
479	4-Methyl-1-Hexanol	818-49-5	953	sweaty	624.93±64.02	462.77±27.57	953.39±79.87	379.98±26.92	876.48±55.84	272.15±15.45	861.76±35.91	500.89±52.73	816.85±73.63	408.3±32.81	858.91±98.14	452.65±49.35
480	Benzyl Alcohol	100-51-6	1036	floral rose phenolic balsamic	509.34±55.8	560.18±73.9	743.99±77.69	543.45±29.73	1049.79±92.12	521.11±26.36	808.21±22.59	447.03±15.15	661.19±57.97	510.31±26.16	686.85±25.18	531.37±43.81
481	Cyclohexanol, 2,6-dimethyl-	5337-72-4	1112		445.38±58.67	261.14±30.35	524.22±25.15	251.76±12.47	506.39±62.88	170.81±13.27	695.7±21.75	209.29±29.85	952.81±30.48	182.62±15.29	1039.16±18.97	176.37±11.1
482	2-Hexen-1-ol, (E)-	928-95-0	862	fresh green leafy fruity unripe banana	461.97±62.73	66.15±23.14	367.59±32.78	171.73±10.78	60.01±45.06	531.29±74.59	718.01±148.36	339.01±40.69	394.09±40.03	431.15±117.54	241.06±57.82	340.76±124.03
483	1-Butanol, 2-methyl-	137-32-6	739	ethereal fusel alcoholic fatty greasy winey whiskey leathery cocoa	255.43±12.51	179.39±37.86	220.64±19.02	94.66±1.53	103.64±3.11	142.1±25.25	141.21±4.8	571.28±84.69	323.87±23.97	233.65±34.85	314.1±12.38	172.72±13.72
484	(S)-2,5-Dimethyl-3-vinylhex-4-en-2-ol	35671-15-9	1039		219.05±26.12	264.39±54.65	313.28±41.7	229.41±9.98	445.74±64.52	211.59±13.59	347.16±10.63	202.01±4.71	281.6±21.46	213.81±9.85	290.73±14.8	220.7±15.36
485	1-Heptanol	111-70-6	970	musty leafy violet herbal green sweet woody peony	224.35±3.37	238.77±23.23	232.84±15.32	141.38±13.29	131.76±14.45	174.75±18.99	191.29±27.61	161.33±21.51	213.95±3.89	221.58±28.48	196.28±13.14	211.78±23.33
486	1-Nonen-4-ol	35192-73-5	1103		203.89±51.7	168.14±34.75	187.08±21.51	207.77±25.16	176.88±14.44	191.05±3.47	205.91±19.44	192.65±8.79	215.72±56.94	219.48±52.46	177.63±26.49	174.41±18.91
487	2-Octen-1-ol, (E)-	18409-17-1	1067	green citrus vegetable fatty	176.87±13.47	152.5±12.81	179.25±15.35	105.09±5.51	124.26±26.2	90.71±8.82	117.5±20.39	99.76±7.58	142.92±12.2	121.6±7.71	128.13±8.27	83.48±14.76
488	Hotrienol	20053-88-7	1106	sweet tropical ocimene fennel ginger myrcene	157.76±22.31	100.85±16.93	152.53±12.27	112.57±7.39	162.13±17.06	84.09±2.83	156.47±22.94	107.33±24.63	148.29±13.38	146.33±6.44	142.95±10.34	92.48±8.33
489	2-Nonen-1-ol	22104-79-6	1105	sweet fatty, melon cucumber vegetable	174.7±52.73	127.49±1.78	186.91±31.96	132.89±14.09	183.11±24.6	121.8±5.44	187.78±27.26	128.33±11.15	190.49±15.26	133.58±21.73	176.89±8.38	111.99±7.94
490	2-Cyclohexen-1-ol, 1-methyl-4-(1-methylethyl)-, cis-	29803-82-5	1122		116.35±26.06	18.72±5.28	203.18±21.92	20.05±0.75	220.68±23.29	23.04±1.34	399.56±42.99	31.08±2.47	608.98±45.81	24.5±2.41	685.18±21.74	58.52±11.76
491	3-Cyclopentyl-1-propanol	767-05-5	1102		107.31±17.11	80.71±14.53	111.79±5.73	105.38±12.06	80.65±7.35	98.44±0.32	102.51±4.36	97.75±1.95	118.5±17.63	107.9±16.79	105.61±4.61	91.31±7.07
492	5,9-Undecadien-2-ol, 6,10-dimethyl-	53837-34-6	1459		95.34±19.28	62.25±17.47	25.66±3.65	64.99±4.58	293.83±16.22	787.93±42.58	130.94±8.77	10.36±1.08	34.05±6.67	47.63±5.43	29.76±5.16	70.7±4.46
493	2-Pentyn-1-ol	6261-22-9	778		94.35±6.18	163.57±17.56	81.51±2.68	55.03±1.79	56.63±2.8	92.05±11.57	60.34±6.77	47.06±13.69	63.35±3.45	94.23±12.89	61.49±1.94	70.02±3.64
494	1-Undecyn-4-ol	22127-86-2	1275		88.56±19.59	76.94±5.52	40.26±2.89	51.17±4.02	516.06±27.98	529.94±24.47	131.8±18.59	32.62±6.01	45.25±5.69	77.36±6.21	46.15±2.71	50.43±6.26
495	Ethanol, 2-(3,3-dimethylcyclohexylidene)-, (Z)-	26532-23-0	1267		89.98±13.79	77.57±4.01	40.43±2.71	50.23±3.13	510.54±27.56	524.42±24.11	124.38±18.93	32.59±6.01	45.56±5.51	75.97±5.95	45±1.68	50.05±6.49
496	2-Penten-1-ol, (E)-	1576-96-1	769	mushroom	78.94±5.75	110.51±13.1	76.33±1.1	41.76±0.61	52.44±1.74	70.92±5.31	56.53±4.69	39.8±9.16	59.04±2.43	72.52±1.44	53.11±4.55	55.55±2.22
497	Cyclopentanol	96-41-3	768		78.88±5.66	109.5±13.52	76.33±1.1	41.76±0.61	52.44±1.74	70.92±5.31	56.52±4.67	41.1±7.7	59.04±2.43	71.12±2.06	53.48±4.03	55.11±2.81
498	1-Octanol	111-87-5	1072	waxy green orange aldehydic rose mushroom	82.11±6.88	54.67±8.91	78.86±8.59	54.19±3.34	58.95±14.72	35.17±4.05	50.58±8.8	34.55±3.88	52.74±5.85	39.66±6.64	48.2±5.97	27.86±7.32
499	2-Octenal, 2-butyl-	13019-16-4	1378	aldehydic green watery fruity metallic oily tropical fatty sweaty goaty	68.37±10.36	44.7±13.83	76.56±10.69	98.07±3	140.78±7.85	130.17±3.06	70.05±8.65	42.85±3.98	77.49±17.46	106.9±5.14	75.45±14.82	95.8±6.62
500	3-Pentanol, 2,4-dimethyl-	600-36-2	829		63.87±3.18	58±2.07	169.87±4.97	33.91±0.68	87.46±0.47	75.49±4.25	113.23±8.09	65.94±8.19	151.03±4.51	103.77±11.77	151.92±6.07	77.68±5.58
501	3-Hexen-1-ol, (Z)-	928-96-1	858	fresh green cut grass foliage vegetable herbal oily	61.08±5.86	126.36±16.76	258.55±12.57	71.67±5.63	248.57±7.99	128.27±17.2	137.46±3.19	82.52±25.25	222.98±14.92	115.82±3.25	203.88±8.56	98.49±25.96
502	7-Octen-2-ol	39546-75-3	969		60.37±1.23	60.97±3.96	59.01±3.69	37.37±3.02	34.24±1.03	47.87±5.2	47.8±6.78	43.38±6.33	50.54±2.56	58.75±8.31	41.74±2.09	54.88±5.04
503	2-Furanmethanol	98-00-0	851	alcoholic chemical musty sweet caramel bread coffee	45.45±1.91	23.34±7.37	69.75±1.86	29.6±3.62	92.09±4.32	54.66±10.75	30.2±2.09	43.43±8.85	85.26±3.56	51.74±2.78	89.52±2.63	79.1±8.54
504	1-Hexanol	111-27-3	868	ethereal fusel oil fruity alcoholic sweet green	50.14±4.32	34.3±2.81	39.73±4.22	30.5±1.98	29.83±13.59	20.38±3.72	26.42±1.22	15.12±1.32	32.92±5	20.89±3.82	27.04±7.38	24.39±3.1
505	1-Decanol	112-30-1	1272	fatty waxy floral orange sweet clean watery	43.8±6.11	26.21±1.38	31.1±3.25	27.14±2.72	100.1±6.28	104.55±4.64	45.45±6.48	29.97±6.42	31.35±2.51	32.18±2.14	28.97±1.16	22.58±3.05
506	2-Hexanol, (R)-	26549-24-6	780	mushroom dusty oily	43.86±2.88	45.76±2.94	49.4±4.55	25.78±1.03	111.67±0.77	32.59±1.35	47.27±0.21	32.75±7.78	68.75±3.79	36.52±4.82	65.18±0.97	37.89±3.47
507	4-Hexen-1-ol, acetate	72237-36-6	1020		44.19±3.66	52.94±10.62	94.15±4.16	31.14±2.81	185.89±4.46	48.46±1.12	91.12±2.09	57.15±4.95	164.47±11.86	78.79±3.87	174.57±7.27	60.84±7.65
508	1,2-Hexanediol, 2-methyl-	56255-50-6	1051		40.86±3.16	29.09±3.47	40.77±2.22	36.6±5.18	67.6±2.13	46.48±5.25	64.13±14.73	60.45±14.06	61.92±11.38	40.62±8.49	68.5±3.81	43.96±14.7
509	Ethanol, 2-butoxy-	111-76-2	907		46.68±3.78	27.68±2.79	49±1.32	38.67±1.24	55.63±5.91	56.71±5.18	67.52±8.82	57.04±4.77	58.18±5.68	65.66±3.97	47.42±0.47	55.46±5.87
510	1-Cyclohexene-1-propanol, .alpha.,2,6,6-tetramethyl-	3293-47-8	1452	woody floral amber	45.18±10.09	28.63±7.94	12.99±1.55	31.39±2.56	142.53±7.32	392.39±18.6	61.29±5.04	4.73±0.34	16.44±3.24	22.72±2.14	14.09±2.58	34.25±2.45
511	Benzenemethanol, 4-methyl-.alpha.-(1-methyl-2-propenyl)-, (R*,R*)-	83173-76-6	1393		37.92±5.76	23.07±9.67	45.03±6.44	56±1.65	80.88±4.78	74.14±2.4	35.53±4.75	17.52±0.6	46.05±11.29	60.29±5.18	44.61±10.24	56.66±3.62
512	2-Nonanol	628-99-9	1102	waxy green creamy citrus orange cheese fruity	33.83±9.44	28.73±6.84	30.54±2.86	34.97±5.02	27.25±3.23	27.36±1.08	34.64±2.89	33.34±1.84	35.17±11.72	34.31±11.8	30.24±3.31	27.52±4.43
513	2,4-Decadien-1-ol	14507-02-9	1274	fatty waxy citrus melon	37.6±5.69	33.93±1.86	19.57±3.4	23.56±2.01	197.65±10.5	201.9±12.15	52.76±8.19	18.1±4.52	21.34±0.35	31.81±2.11	27.28±4.23	20.63±3.04
514	Prenol	556-82-1	776	fruity green lavender	38.95±3.45	72.96±9.37	37.06±0.81	26.84±1.14	29.74±2.25	36.78±3.24	25.93±1.79	23.01±5.24	26.18±2.48	37.09±6.52	26.81±0.2	28.67±3.33
515	1-Octen-1-ol, acetate	77149-68-9	1191		37.27±6.5	21.45±2.18	44.42±3.37	17.22±2.4	42.17±2.24	37.48±2.44	59.61±6.42	33.83±6	59.91±2.95	53.6±5.3	62.35±8.12	31.48±5.97
516	Cyclooctanemethanol	3637-63-6	1073		34.1±2.11	18.69±1.81	34.19±3	19.77±2.06	17.87±5.92	13.85±2.31	22.66±2.27	13.07±2.36	22.09±3.2	15.14±2.17	22.04±2.06	10.94±2.6
517	Benzenemethanol, .alpha.-methyl-	98-85-1	1061	fresh sweet acetophenone gardenia hyacinth	29.28±3.25	49.01±2.7	45.68±0.27	72.34±7.67	79.72±0.53	70.52±2.67	46.78±1.39	31.45±3.64	44.32±2.41	36.81±1.73	49.35±1.32	61.61±5.98
518	2-Nonen-1-ol, (E)-	31502-14-4	1169	waxy green violet melon	30.08±4.72	19.52±1.85	28.17±2.8	12.42±1.43	41.64±3.59	18.34±1.7	43.78±9.4	19.69±2.65	44.42±3.96	36.36±3.77	48.5±8	20.31±4.87
519	3-Nonen-1-ol, (E)-	10339-61-4	1143	green waxy melon cucumber	31.1±1.65	17.94±1.42	48.42±5.98	18.09±1.59	27.34±3.43	24.26±1.28	27.83±3.34	22.79±2.77	47.3±1.65	26.36±3.2	52.96±8.76	15.03±2.73
520	p-Hydroxyphenyl methyl carbinol	2380-91-8	1374		26.79±8.33	32.51±17.49	16.48±3.61	55.41±8.92	44.67±6.75	50.22±2.13	35.84±3.58	44.76±6.88	17.33±4.42	33.26±3.9	14.38±4.79	29.07±1.21
521	Glycerin	56-81-5	967		21.96±3.83	15.77±2.18	26.5±1.43	12.1±0.64	17.07±0.71	8.71±0.56	42.28±1.83	32.39±2.06	39.98±5.6	28.34±13.05	42.62±4.27	16.21±2.88
522	Ethanol, 2,2'-oxybis-	111-46-6	927		25.36±1.99	32.92±0.52	25.45±2.54	18.51±1.79	25.63±2.98	26.17±1.85	16.72±12.38	35.61±3.65	7.16±0.8	5.77±1.46	7.15±0.82	4.31±0.22
523	3-Nonen-1-ol, (Z)-	10340-23-5	1156	fresh waxy green melon rind tropical mushroom	22.23±1.71	22.77±3.19	18.98±2.63	20.49±0.88	29.92±2.88	14.81±0.32	22.12±3.26	17.38±3.16	18.62±1.04	18±3.92	19.94±3.99	12.4±3.18
524	Cyclohexanol, 1-methyl-	590-67-0	908		21.99±1.51	27.2±3.64	49.21±4.47	8.79±1.01	0±0	19.07±15.57	16.77±1.08	26.5±4.66	59.09±3.2	42.82±4.21	57.66±0.68	22.75±2.53
525	Cyclohexanol, 1-ethenyl-	1940-19-8	1020		18.43±3.44	13.92±2.07	19.27±0.49	13.09±0.38	25.08±1.61	17.7±3.2	22.61±2.61	12.87±1.65	20.11±1.94	18.42±0.9	17.26±0.43	17.53±0.17
526	Cyclobutaneethanol, 1-methyl-2-(1-methylethenyl)-, cis-	30820-22-5	1183		14.5±1.82	16.19±2.25	16.25±2.42	10.24±1.03	25.68±0.45	13.75±0.88	22.8±3.33	13.85±2.1	28.84±1.26	20.4±0.51	30.55±2.6	14.64±3.01
527	6-Nonen-1-ol, (E)-	31502-19-9	1167		12.76±2.29	9.15±0.22	13.08±0.57	7.23±0.6	19.51±1.18	11.56±1.03	18.97±3.8	8.61±0.46	19.08±1.57	18.26±1.67	20.76±2.1	10.87±1.24
528	1-Pentanol	71-41-0	766	fusel oil sweet balsam	11±2.05	12.2±3.26	52.03±5.75	5.5±0.65	56.44±3.24	37.85±17.24	17.03±1.58	12.76±3.09	42.26±3.21	23.1±3.56	42.2±0.81	20.97±1.88
529	7-Octene-2,6-diol, 2,6-dimethyl-	29210-77-3	1237		13.71±3.35	0.5±0.7	13.77±1.02	6.75±1.25	0±0	11.95±1.17	14.1±1.99	9.48±1.54	14.22±2.37	12.39±0.95	5.85±0.88	10.55±1.04
530	Cyclohexanol	108-93-0	880	camphor menthol phenol	13.77±3.05	8.98±2.12	22.43±1.23	5.43±0.81	17.12±2.3	5.26±0.46	16.85±3.46	6.28±0.45	41.65±2.8	19.06±4.13	49.74±4.91	7.17±2.36
531	3-Octanol	589-98-0	994	earthy mushroom herbal melon citrus woody spicy minty	10.5±0.66	8.85±0.29	42.55±0.82	8.99±0.37	28.3±0.74	8.63±0.79	17.55±1.78	11.35±1.05	55.04±3.54	17.4±0.68	60.51±3.38	15.26±0.56
532	6-Undecanol	23708-56-7	1277		11.25±2.14	6.16±1.34	8.6±0.92	6.11±0.85	18.18±2.13	23.3±0.62	11.16±1.9	8.42±0.72	9.23±1.06	9.62±0.66	8.74±0.43	6.57±1.2
533	3-Mercaptohexanol	51755-83-0	1127	sulfurous fruity tropical	10.66±2.89	4.1±1.01	31.55±1.77	6.85±0.8	13.05±1.33	15.37±2.83	21.04±9.14	6.01±0.51	28.47±1.77	12.66±6.45	42.99±4.31	13.23±4.67
534	2-Cyclohexen-1-ol, 1-methyl-4-(1-methylethenyl)-, trans-	7212-40-0	1123		8.48±1.35	7.96±0.27	8.12±1.33	5.76±0.31	8.33±1.66	4.82±0.44	9.93±2.58	8.73±0.76	9.16±1.62	6.84±1.93	9.11±1.06	4.4±0.56
535	5-Hepten-2-ol, 6-methyl-	1569-60-4	994	sweet oily green coriander	10.3±0.87	7.4±0.66	48.24±1.19	8.09±0.37	31.62±1.47	8.64±0.2	15.64±2.51	10.45±1.63	68.25±3.31	16.23±1.01	74.74±5.12	14.88±0.72
536	3-Pentyn-1-ol	10229-10-4	778		9.24±0.41	17.37±2.69	9.5±0.52	5.97±0.67	6.32±0.58	9.77±0.71	7.02±0.3	4.86±1.15	5.67±1.44	10.36±0.77	5.2±0.34	8.15±1.42
537	1-Propanol, 3-(methylthio)-	505-10-2	981	sulfurous onion sweet soup vegetable	7.82±1.03	13.57±2.7	7.35±0.68	14.58±1.8	15.33±1.01	13.52±0.76	13.6±2.89	11.31±1.5	13.23±2.49	17.18±0.72	13.79±0.47	14.39±1.23
538	Benzenemethanol, .alpha.-2-propenyl-	936-58-3	1244		4.77±2.12	6.29±1.46	2.57±0.44	5.37±1.24	17.47±0.9	15.69±0.66	11.27±0.57	5.59±2.1	5.92±3.53	7.9±4.86	6.63±3.55	4.72±1.99
539	2,4-Heptadien-1-ol, (E,E)-	33467-79-7	1004	green fruity nutty cheese	5.07±0.57	2.41±0.48	13.05±0.75	2.33±0.51	15.8±0.88	9.6±0.88	8.25±0.06	5.03±0.98	19.89±1.01	8.26±1.82	25.82±0.62	10.67±2.5
540	(E)-2,6-Dimethylocta-5,7-dien-2-ol	7643-60-9	1169		5.16±0.19	2.66±0.83	7.24±0.97	6±0.23	17.02±0.92	12.07±0.38	5.74±1.82	3.25±0.62	9.58±1.94	6.71±0.29	10.58±1.58	7.54±0.74
541	1-Hexanol, 3,5,5-trimethyl-	3452-97-9	1047	grassy green weedy floral earthy aldehydic hay straw leaf	5.52±2.21	6.17±0.55	21.29±0.5	9.51±1.9	11.02±2.82	9.45±2.47	8.01±2	7.59±3.16	37.15±4.23	12.5±1.2	43.78±2.44	8.16±0.77
542	1-Nonanol	143-08-8	1173	fresh clean fatty floral rose orange dusty wet oily	3.69±0.25	2.2±0.22	3.58±0.88	2.16±0.35	6.61±0.44	4.51±0.25	6.67±0.82	3.03±0.65	6.32±0.55	5.5±0.42	6.68±0.97	3.61±0.73
543	Benzenemethanol, .alpha.,4-dimethyl-	536-50-5	1169	sweet hawthorn floral nutty powdery	2.75±0.5	1.95±0.56	3.5±0.81	3.15±0.14	16.72±0.29	9.32±0.41	2.64±0.36	1.57±0.11	5.03±0.84	3.61±0.56	5.72±0.89	6.8±0.53
544	2-Hexanol	626-93-7	801	chemical winey fruity fatty terpenic cauliflower	1.21±0.57	0.98±0.26	5.92±0.68	2.33±0.35	34.46±2.53	4.28±0.46	2.13±0.32	1.03±0.53	8.3±1.21	1.49±0.23	8.66±0.28	5.21±0.65
545	2-Octanol	123-96-6	998	fresh spicy green woody herbal earthy	1.09±0.37	0.76±0.32	4.72±0.48	0.51±0.21	3.17±0.42	0.62±0.26	2.36±0.42	1.34±0.44	7.45±0.48	2.11±0.22	7.99±0.82	1.29±0.09

## Sheet: Table S4
Table S4. Content of different types of VOCs in SPWTs and APWTs
Volatile compounds	Relative content（%）
	CSM21	QSM21	CSM20	QSM20	CSM19	QSM19	CMD21	QMD21	CMD20	QMD20	CMD19	QMD19
Ester	7.6±0.56	6.20±0.51	6.54±0.23	7.91±0.21	7.74±0.19	8.15±0.17	5.38±0.33	6.91±0.98	5.38±0.46	6.55±0.70	5.15±0.44	6.07±0.18
Heterocyclic compound	19.15±0.92	25.48±2.67	19.75±0.30	29.26±1.31	24.73±1.09	26.82±0.28	19.90±0.22	18.92±0.36	18.80±0.39	27.61±1.12	18.18±0.55	27.13±1.15
Ketone	7.15±0.03	6.02±0.19	7.17±0.01	5.76±0.06	6.56±0.05	6.08±0.03	7.58±0.18	6.76±0.06	8.19±0.08	5.84±0.09	8.40±0.10	6.04±0.00
Hydrocarbons	28.59±0.63	27.09±1.75	28.58±0.16	22.02±0.76	22.59±0.77	16.93±0.34	29.78±0.54	31.08±1.08	29.52±0.47	25.91±0.10	29.92±0.60	25.61±0.54
Terpenoids	22.85±0.57	21.29±0.77	22.90±0.21	20.69±0.25	23.62±0.05	25.14±0.19	24.06±0.17	21.30±0.24	23.80±0.26	20.13±0.34	24.32±0.27	20.91±0.64
Acid	1.65±0.04	2.09±0.07	1.70±0.02	2.31±0.05	1.71±0.03	2.18±0.04	1.18±0.01	1.70±0.02·	1.22±0.02	1.72±0.02	1.19±0.01	1.84±0.06
Aldehyde	6.64±0.06	5.77±0.13	7.35±0.06	5.56±0.09	6.73±0.11	6.19±0.12	6.66±0.05	7.10±0.09	7.80±0.12	6.01±0.15	7.68±0.06	6.77±0.24
Ether	1.46±0.04	1.37±0.10	1.47±0.02	0.94±0.04	1.31±0.05	1.07±0.02	1.66±0.05	1.65±0.10	1.63±0.06	1.25±0.01	1.68±0.06	1.24±0.03
Halogenated hydrocarbons	0.40±0.03	0.29±0.02	0.36±0.01	0.25±0.01	0.25±0.01	0.31±0.01	0.22±0.01	0.69±0.01	0.30±0.01	0.37±0.03	0.29±0.01	0.30±0.01
Phenol	0.19±0.01	0.30±0.01	0.20±0.01	0.48±0.01	0.30±0.01	0.63±0.02	0.16±0.00	0.16±0.01	0.14±0.01	0.31±0.01	0.16±0.01	0.31±0.01
Aromatics	0.13±0.01	0.13±0.01	0.25±0.01	0.12±0.00	0.17±0.00	0.19±0.01	0.11±0.00	0.14±0.00	0.23±0.00	0.17±0.01	0.24±0.01	0.15±0.00
Alcohol	4.02±0.14	3.78±0.15	3.62±0.15	4.43±0.02	4.09±0.04	5.86±0.18	3.18±0.16	3.49±0.32	2.91±0.17	3.82±0.15	2.71±0.11	3.47±0.13
Note:Data are mean ± standard deviation (n=3)

## Sheet: Table S5
Table S5. VIP and P values of the 54 volatile components
No.	Volatile compounds	VIP Value	P Value
1	4-methyl-1-(1-methylethyl)-Bicyclo[3.1.0]hex-2-ene	7.70679	0.000423123
2	Sabinen	7.70165	0.000423123
3	Octane, 2,6,6-trimethyl-	7.39398	0.000439635
4	(E)-4,8-Dimethylnona-1,3,7-triene	5.26937	0.000313945
5	Bicyclo(3.3.1)non-2-ene	5.01495	0.000434714
6	CyclohexanecarboxAldehyde	4.80642	0.000426953
7	2-Isopropyl-5-methylpyrazine	4.80044	0.000367876
8	5-Methyl-(E)-2-hepten-4-one	4.67603	0.000425034
9	2,6-Dimethylpiazine	4.50093	0.000683276
10	3-Propylpyridine	4.46668	0.00177943
11	Bicyclo[2.2.1]heptane, 7,7-dimethyl-2-methylene-	3.63929	0.000785914
12	5-Ethyl-2(5H)-furanone	3.39745	0.00044461
13	Benzene, (methoxymethyl)-	3.00872	0.000420273
14	Bicyclo[3.1.0]hex-3-en-2-one, 5-(1-methylethyl)-	2.97445	0.000297297
15	Camphenone, 6-	2.96995	0.000324074
16	.gamma.-Terpinene	2.70789	0.000353202
17	4-Pyridinecarboxaldehyde	2.65949	0.000397237
18	1,5-Diazabicyclo[3.1.0]hexane	2.15795	0.000810681
19	Methyl methacrylate	2.01918	0.000677219
20	(-)-beta-Pinene	1.86276	0.00164237
21	2,6,6-Trimethylcyclohexa-1,4-dienecarbAldehyde	1.78144	0.000321877
22	2-Methylpropyl butanoate	1.62212	0.000777248
23	2-Methyl-7-exo-vinylbicyclo[4.2.0]oct-1(2)-ene	1.59568	0.000324074
24	p-Mentha-1,5,8-triene	1.59385	0.000319695
25	2,6,6-Trimethyl-2-vinyltetrahydropyran	1.54003	0.000432761
26	trans-2-Hexenal	1.52424	0.000452684
27	2-Hexenal	1.49996	0.000475633
28	Fenchol	1.47693	0.000311109
29	2-Cyclohexene-1-carboxaldehyde, 2,6,6-trimethyl-	1.47521	0.00031897
30	(2E,4E)-2,4-Octadienal	1.47371	0.000313234
31	Cyclohexanol, 2,6-dimethyl-	1.47099	0.000458834
32	1-Hepten-6-one, 2-methyl-	1.40552	0.000455749
33	Tiglic Acid	1.40542	0.00148617
34	1-Hexanol, 4-methyl-	1.37645	0.000770382
35	ethyl 2-methyl-2-butenoate	1.37426	0.00119991
36	Methyl tetradecanoate	1.3724	0.000727172
37	6-Pentyl-2H-pyran-2-one	1.37159	0.000579314
38	Iridomyrmecin	1.37109	0.000540498
39	Cyclopentene, 1-butyl-	1.3312	0.0027871
40	.beta.-Pinene	1.32636	0.00219331
41	2H-Pyran-2-one, tetrahydro-	1.25194	0.000410906
42	1,2,4,5-Tetrazin-3-Amine	1.24941	0.000413695
43	(-)-cis-rose oxide	1.24719	0.000275394
44	caramel furanone	1.23925	0.000354002
45	2-Cyclohexen-1-ol, 1-methyl-4-(1-methylethyl)-, cis-	1.22564	0.000361282
46	trans-Rose oxide	1.22535	0.000358028
47	Rose oxide	1.20947	0.00036292
48	Adamantane	1.20811	0.000321148
49	2-Methyl-3(2-furyl)acrolein	1.2065	0.000318248
50	Cyclohexanol, 1-methyl-4-(1-methylethyl)-, cis-	1.11734	0.002799
51	Ethyl 3-Hydroxyhexanoate	1.11678	0.002799
52	1,3,5-Cycloheptatriene, 2,3,4,5,7,7-hexamethyl-	1.11523	0.00034765
53	Bicyclo[2.2.1]heptane, 2-chloro-1,7,7-trimethyl-, (1R-endo)-	1.03771	0.000336802
54	Cyclohexene, 1-methoxy-	1.01942	0.000386622

## Sheet: Table S6
Table S6.The VOCs with OAVs ≥ 1 and VIP>1
No.	Volatile compounds	Odor threshold(ug/kg)	OAV
			CSM21	QSM21	CSM20	QSM20	CSM19	QSM19	CMD21	QMD21	CMD20	QMD20	CMD19	QMD19
1	Sabinen	98	166.042	124.451	220.183	73.9366	150.844	51.3959	301.08	201.827	341.27	140.77	366.295	135.4
2	2,6-Dimethylpiazine	10000	0.516028	0.34475	0.870839	0.375422	1.18027	0.448762	0.913512	0.323511	0.955813	0.440515	0.896487	0.570515
3	γ-Terpinene	2100	0.48788	0.128996	0.896406	0.133424	0.713412	0.124014	0.85191	0.156489	1.35923	0.176173	1.46268	0.34742
4	trans-2-Hexenal	40	11.0075	5.19575	36.2487	7.50343	35.9914	20.6735	8.3097	10.1846	46.4565	12.5818	39.7997	25.7172
5	2-Hexenal	150	2.72022	1.3767	9.53594	1.97439	9.58455	5.12933	1.9964	2.54407	12.2935	3.40295	10.6132	7.296
6	(2E,4E)-2,4-Octadienal	140	1.23636	0.138304	2.08312	0.11427	2.23037	0.195959	4.07967	0.299104	6.12947	0.234631	6.9523	0.541414
7	Tiglic Acid	60000	0.0201969	0.0222081	0.0308126	0.0181826	0.0280254	0.0126026	0.0257954	0.021028	0.0274202	0.0197906	0.0283669	0.0211845
8	β-Pinene	140	6.19334	11.4969	6.40607	11.5812	11.9175	10.7267	10.8675	8.82254	10.3502	16.1009	9.99503	13.3849
9	2H-Pyran-2-one, tetrahydro-	1000000	0.000500589	0.000387753	0.000633789	0.000262207	0.000462212	0.000195914	0.000863578	0.000604588	0.000956049	0.000461029	0.00101712	0.000398898
10	(-)-cis-rose oxide	0.2	537.177	0	1003.18	0	1093.62	0	1899.4	0	2980.16	0	3369.65	244.594
11	caramel furanone	11	10.6303	1.5966	18.0566	1.42299	18.4242	2.28488	37.5915	2.44419	57.2821	2.60109	64.4606	4.55676
12	trans-Rose oxide	0.5	232.71	37.4439	404.496	40.1038	441.363	49.4825	808.611	67.307	1217.96	48.9967	1370.37	117.042
13	Rose oxide	0.2	565.992	113.313	1009.11	90.1083	1102.21	126.566	1879.53	167.282	2983.53	112.105	3387.7	289.528
